# Supplementary material for: Incorporation of N7-Platinated Guanines into Thermus Aquaticus (Taq) DNA Polymerase: Atomistic Insights from Molecular Dynamics Simulations
Source: MDPI journal article supplement (doi:10.3390/ijms24129849), 2023-06-07
Supplement: s1 [file s1]

## **-Supplementary information-**

# **Incorporation of *N*7-Platinated Guanine into *Thermus Aquaticus* DNA Polymerase (Taq DNA Polymerase): Atomistic Insights from Molecular Dynamics Simulations**

**Federica De Castro <sup>1</sup>, Giada Ciardullo <sup>2</sup>, Francesco Paolo Fanizzi <sup>1</sup>, Mario Prejanò <sup>2</sup>, Michele Benedetti <sup>1,\*</sup> and Tiziana Marino <sup>2,\*</sup>**

<sup>1</sup> Dipartimento di Scienze e Tecnologie Biologiche ed Ambientali, Università del Salento, Prov.le Lecce-Monteroni, Centro Ecotekne, I-73100 Lecce, Italy

<sup>2</sup> Dipartimento di Chimica e Tecnologie Chimiche, Laboratorio PROMOCS cubo 14C, Università della Calabria, I-87036 RENDE (CS), Italy

\* Correspondence: [michele.benedetti@unisalento.it](mailto:michele.benedetti@unisalento.it); [tiziana.marino65@unical.it](mailto:tiziana.marino65@unical.it)

|                                                    |     |
|----------------------------------------------------|-----|
| <b>Figure S1</b> .....                             | S2  |
| <b>Figure S2</b> .....                             | S4  |
| <b>Figure S3</b> .....                             | S5  |
| <b>Figure S4</b> .....                             | S5  |
| <b>Figure S5</b> .....                             | S6  |
| <b>Figure S6</b> .....                             | S7  |
| <b>Figure S7</b> .....                             | S7  |
| <b>Figure S8</b> .....                             | S8  |
| <b>Figure S9</b> .....                             | S9  |
| <b>Figure S10</b> .....                            | S10 |
| <b>Replicas of Taq:DNA:ligand complexes.</b> ..... | S10 |
| <b>Figure S11</b> .....                            | S11 |
| <b>Figure S12</b> .....                            | S12 |
| <b>Table S1</b> .....                              | S13 |
| <b>Table S2.</b> .....                             | S13 |
| <b>Parameters in Amber16 format.</b> .....         | S14 |

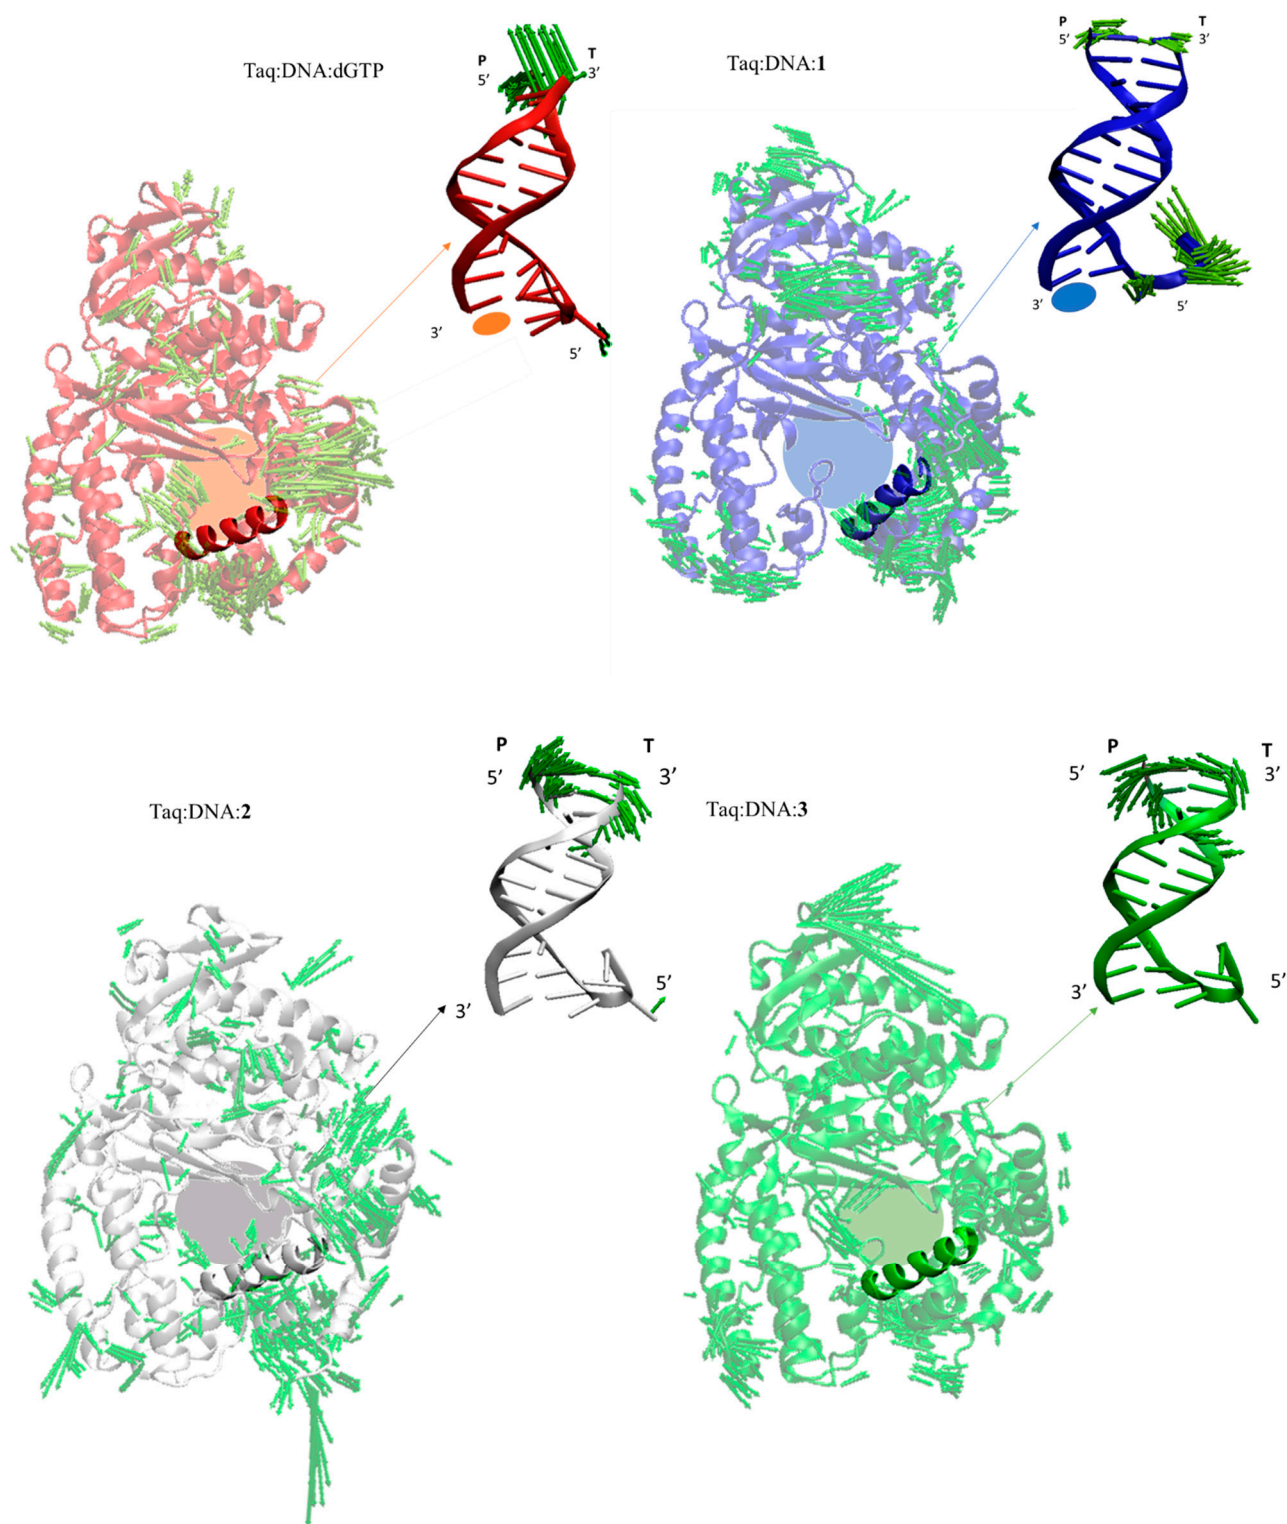

**Figure S1.** Principal component analysis (PCA) calculated for the investigated systems. Major fluctuations are represented as green arrows.

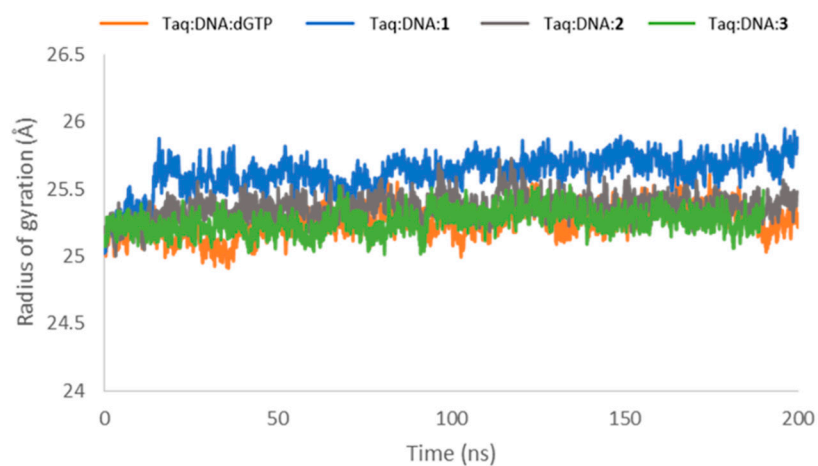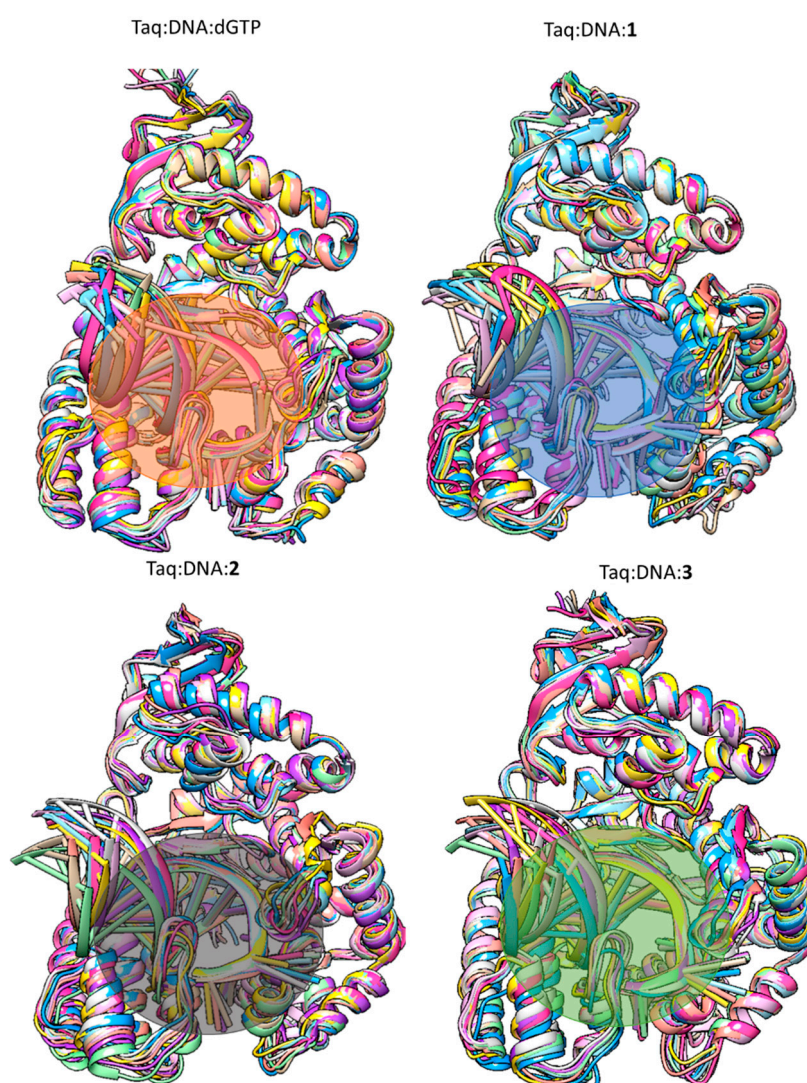

**Figure S2.** On the top, radius of gyration and, on the bottom, superposition of ten clustered geometries calculated for the investigated systems.

(a)

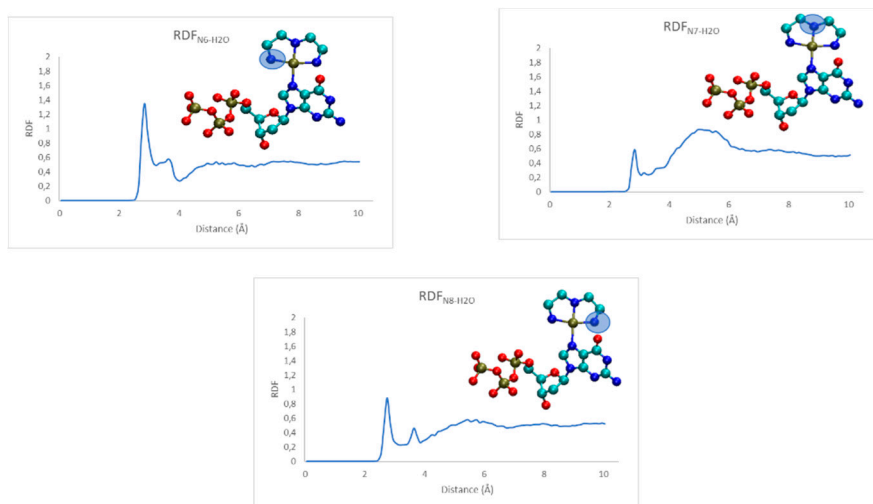

(b)

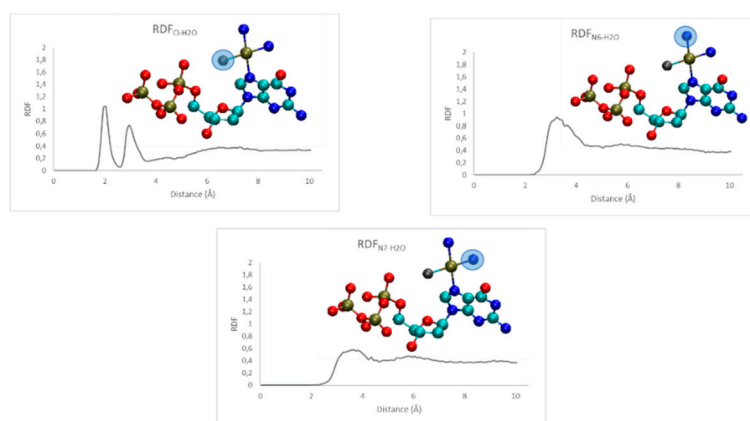

(c)

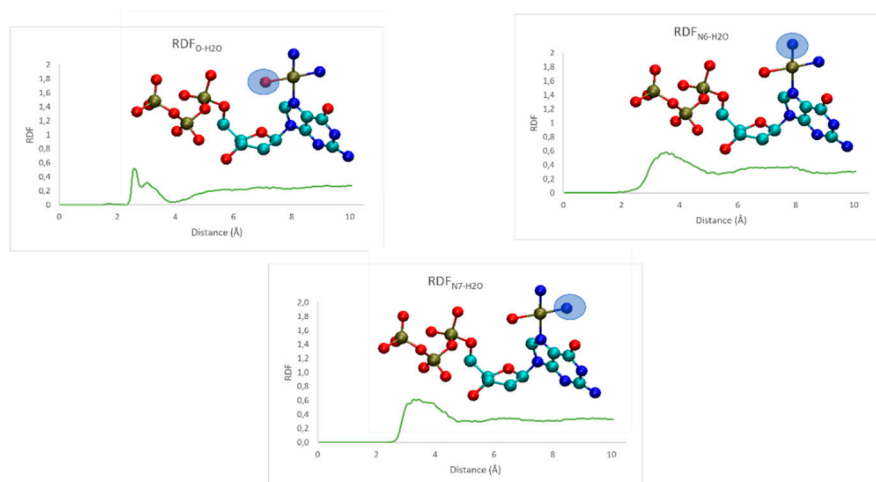

**Figure S3.** Radial distribution function (RDFs) of  $N6-H_2O$ ,  $C1-H_2O$  and  $N7-H_2O$  pairs, concerning the water molecule and the ligand to the Pt atoms (circled in the images), calculated for (a) Taq:DNA:1, (b) Taq:DNA:2, and (c) Taq:DNA:3 complexes.



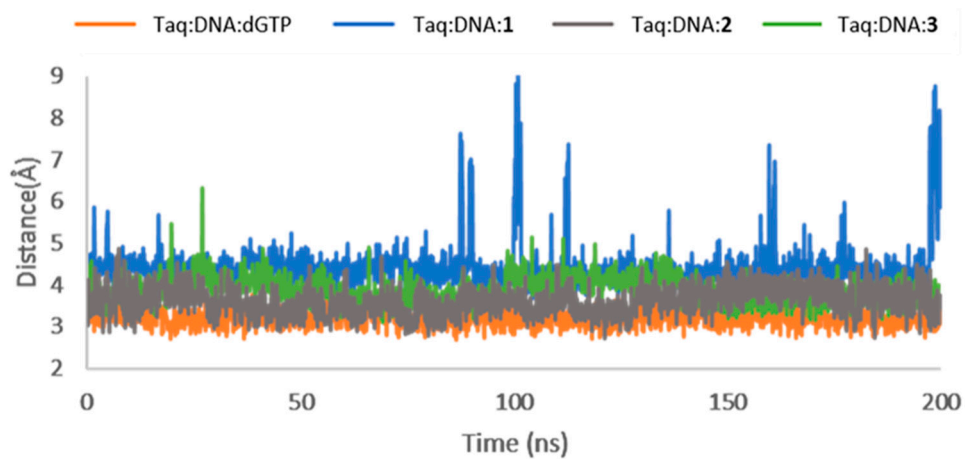

**Figure S4.**  $O_{dNTP}-N_{K663}$  distance obtained from the molecular dynamics simulations of the four investigated systems.

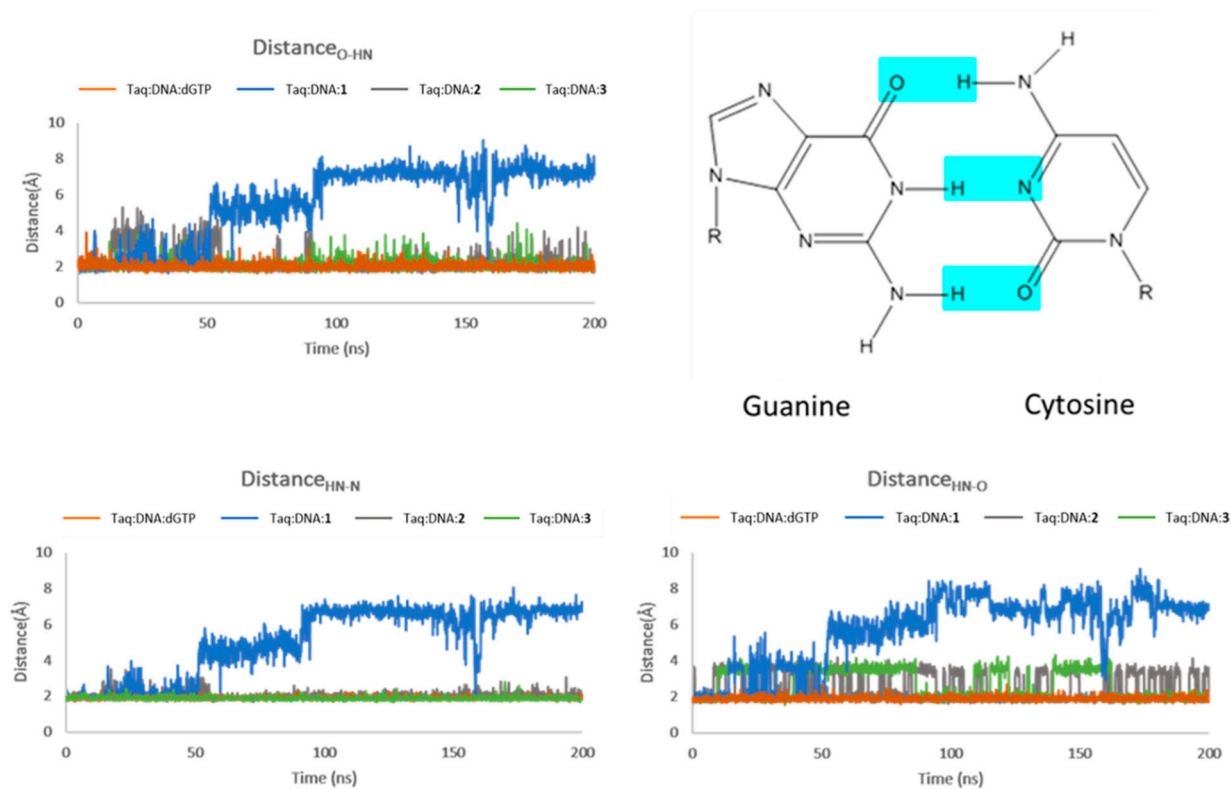

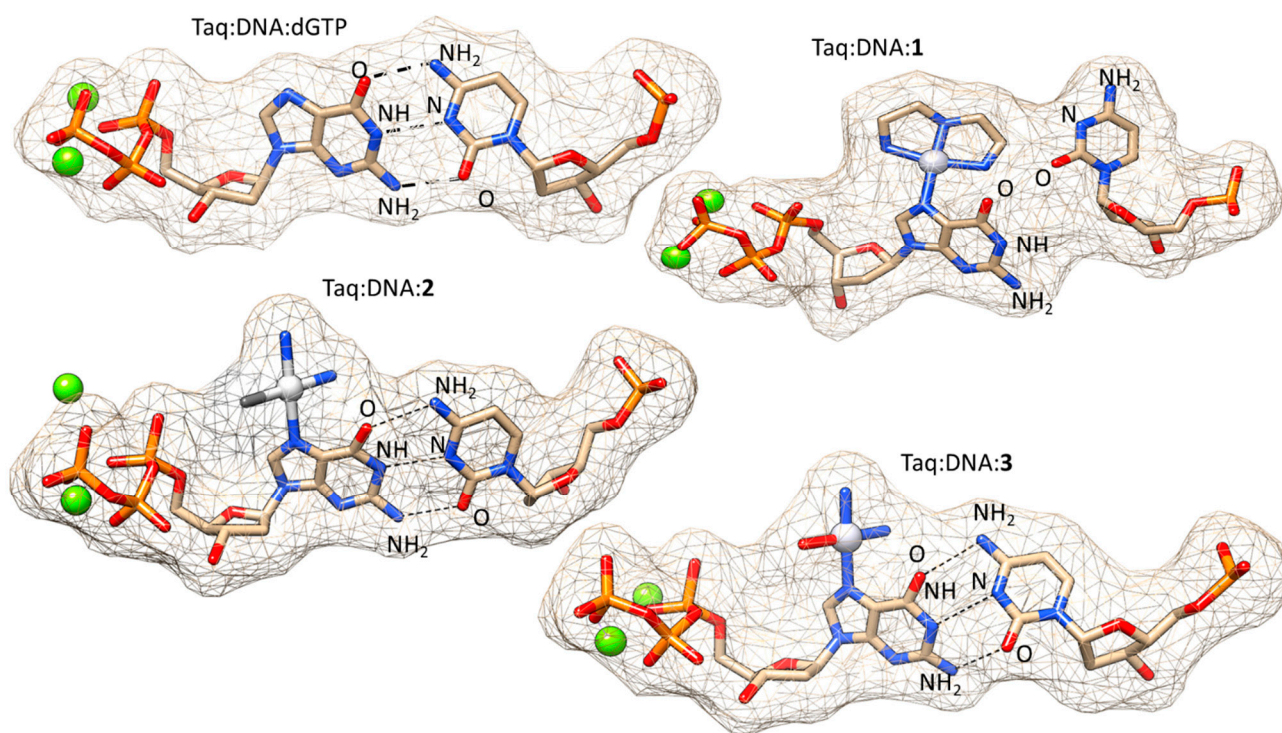

**Figure S5.** On the top, pairing of guanosine<sub>dNTP</sub>-cytosine investigated in terms of hydrogen-bond parameters, obtained from the molecular dynamics simulations of the investigated ternary complexes. On the bottom, focus on the paired guanosine<sub>dNTP</sub>-cytosine obtained from most representative clustered geometry.

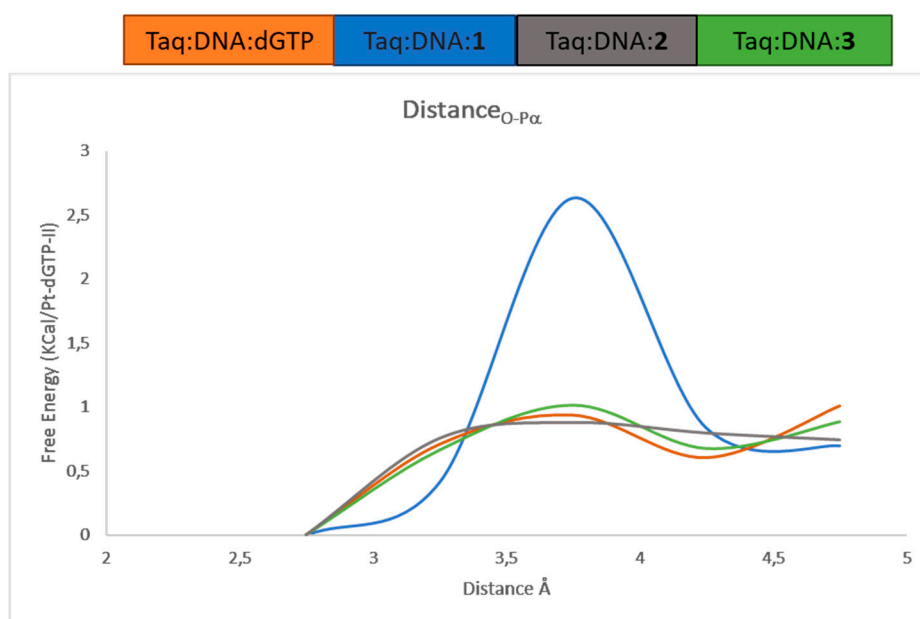

**Figure S6.** Potential of Mean Force (PMF) calculated for the four different ternary complexes, obtained from umbrella sampling simulations performed on the O<sub>dC551</sub>-P<sub>α</sub><sub>dNTP</sub> distance.

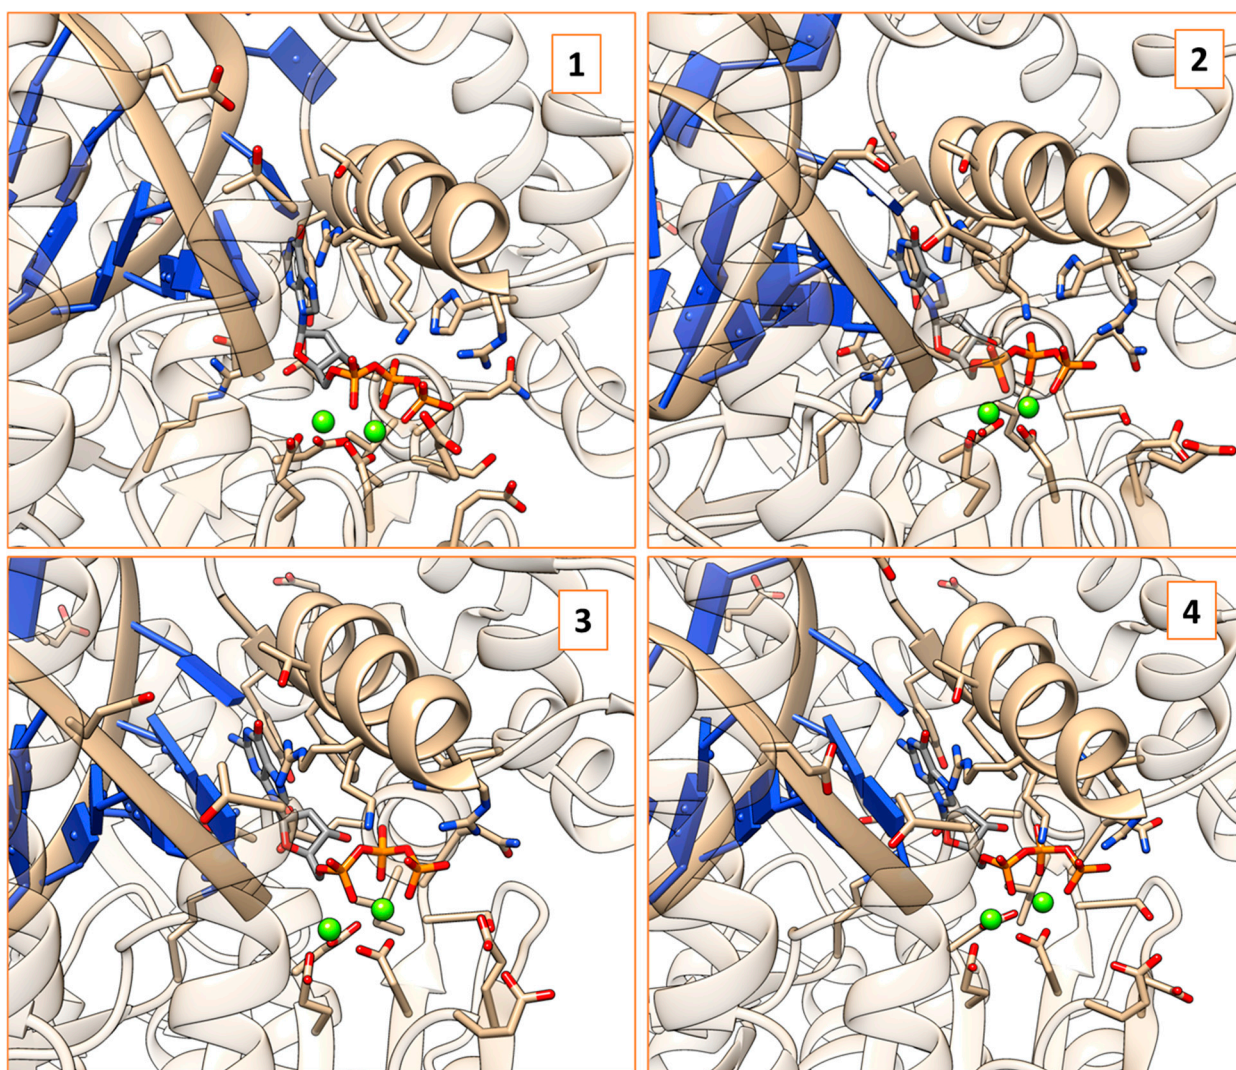

**Figure S7.** Snapshots of molecular dynamics trajectories, extrapolated at 50, 100, 150 and 200 ns, obtained for the Taq:DNA:dGTP system.



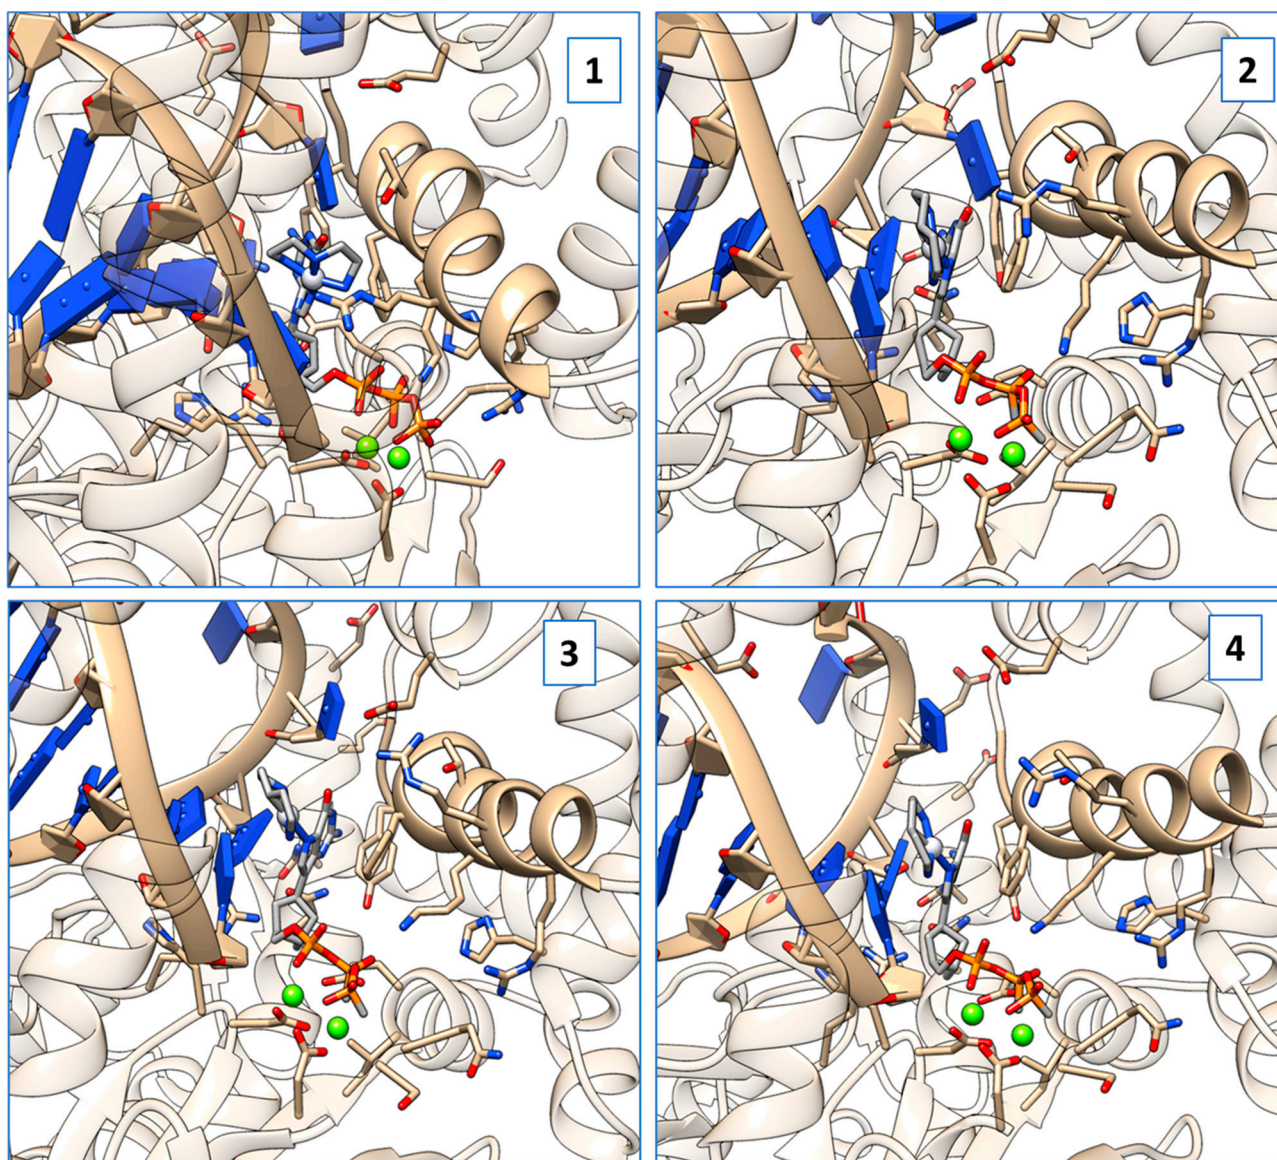

**Figure S8.** Snapshots of molecular dynamics trajectories, extrapolated at 50, 100, 150 and 200 ns, obtained for the Taq:DNA:1 system.



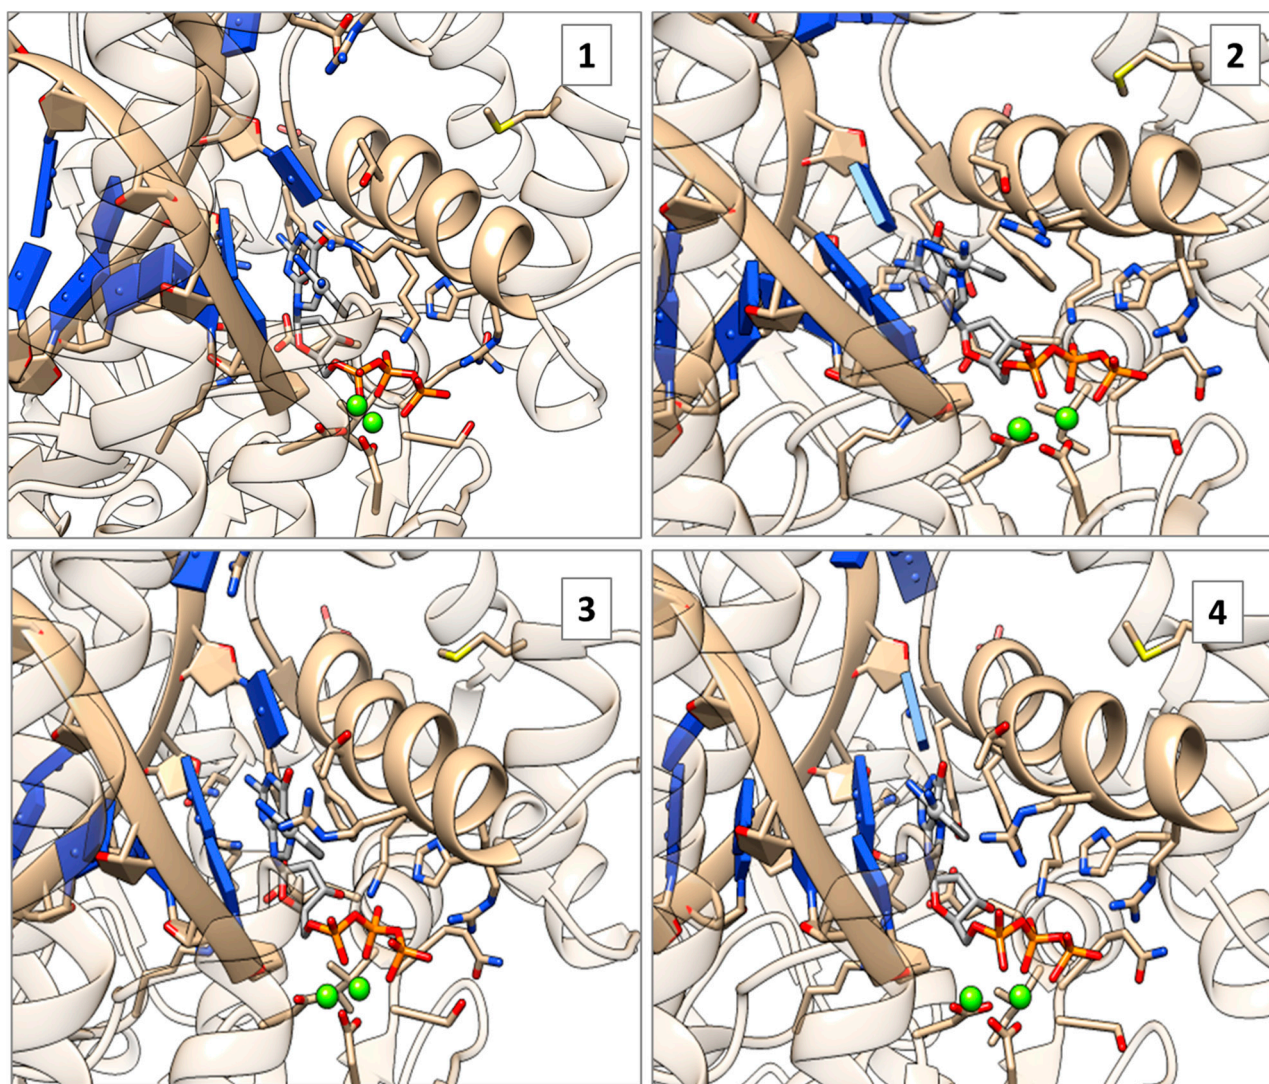

**Figure S9.** Snapshots of molecular dynamics trajectories, extrapolated at 50, 100, 150 and 200 ns, obtained for the Taq:DNA:2 system.



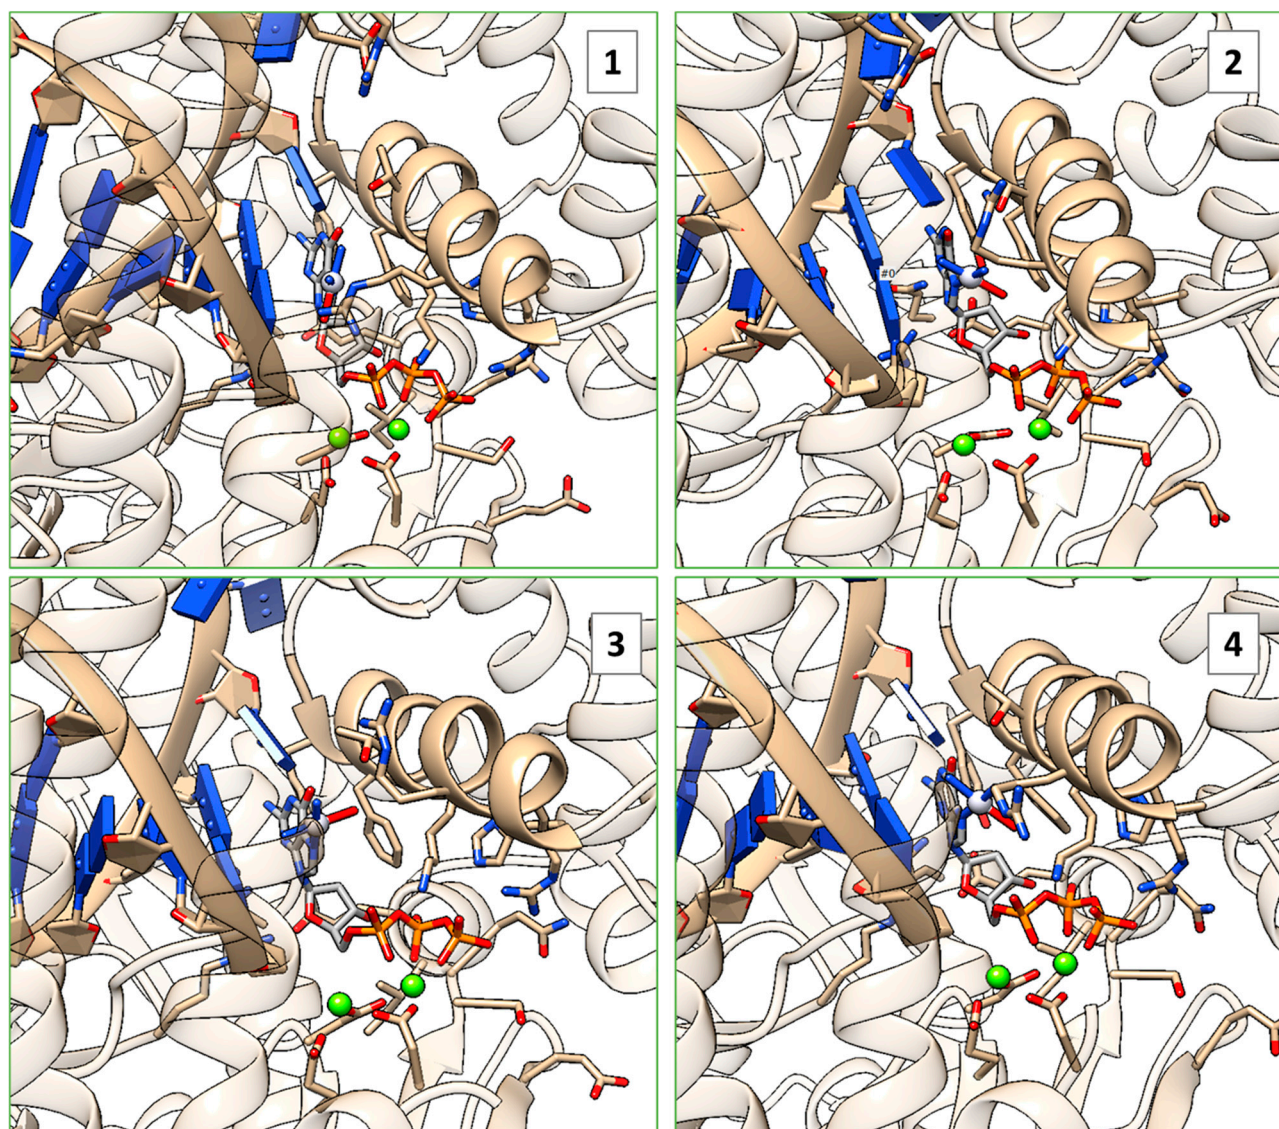

**Figure S10.** Snapshots of molecular dynamics trajectories, extrapolated at 50, 100, 150 and 200 ns, obtained for the Taq:DNA:3 system.

### Replicas of Taq:DNA:ligand complexes

A control on the reproducibility of the conformational behavior observed for all considered complexes was preliminary performed. In detail, additional 100 ns of molecular dynamics were carried out starting from input geometry obtained from the heating phase of the simulation and selecting the same procedure (conditions, algorithms, and software) discussed in the main text (see Methods section). At this stage of the investigation, the attention was mainly focused on the structural parameters considered in the initial part of the study, like RMSD, RMSF, radius of gyration and visual inspection of representative structures obtained from the hierarchical clustering procedure.

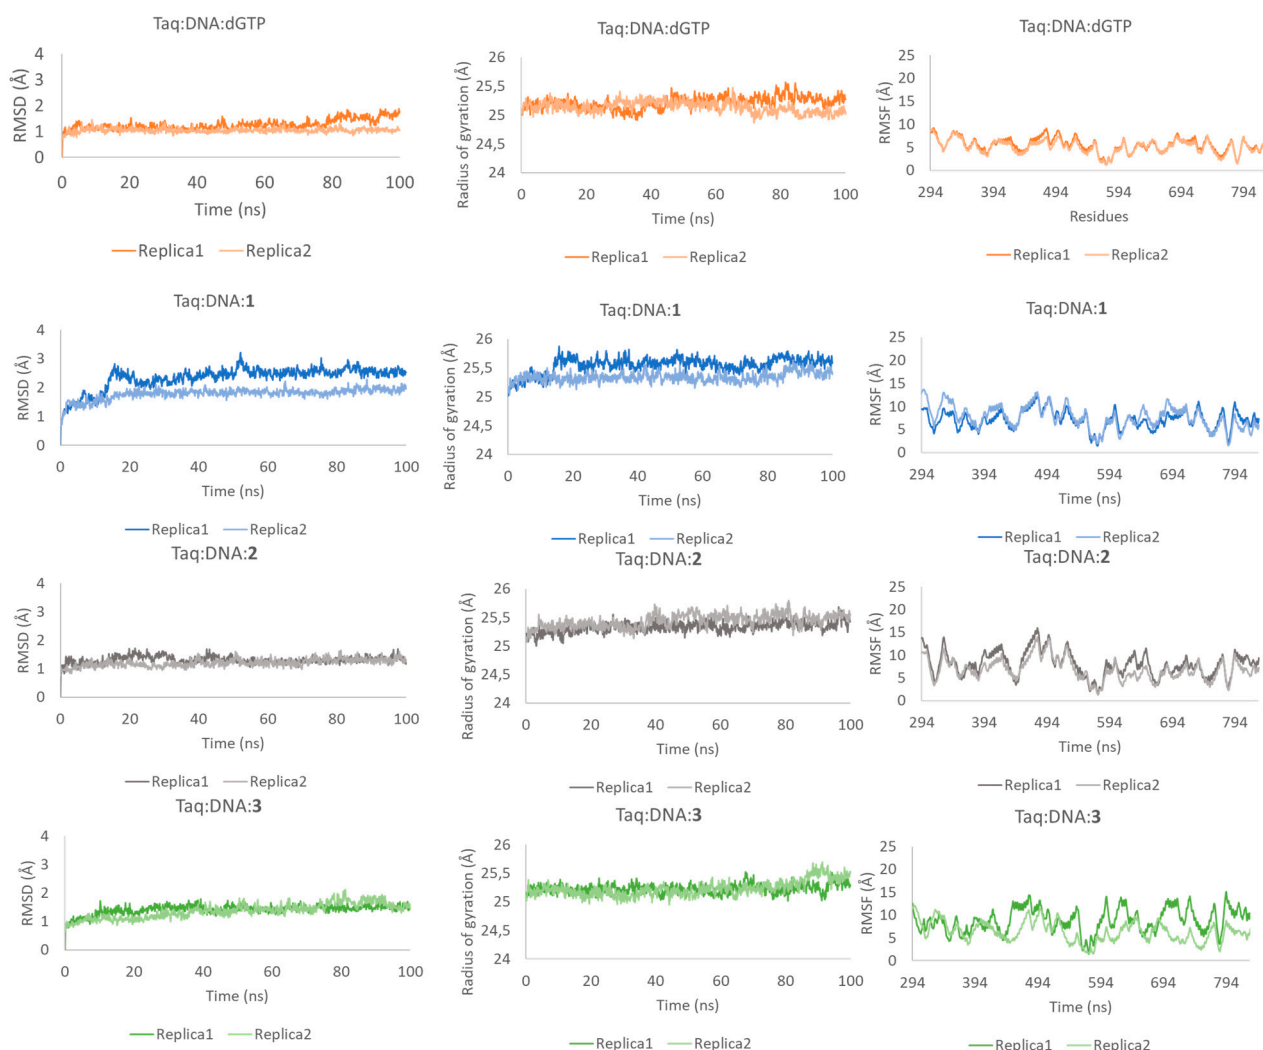

**Figure S11.** Structural parameters, considered for the analysis of the replicas carried out for the considered systems.

The comparison of each replica at 100 ns showed a reproducible RMSD trend for all the considered complexes, with higher values ( $>2$  Å) obtained for Taq:DNA:1, as reported in **Figure S11**. Overall, the structural reproducibility was evinced by the analysis of RMSF and radius of gyration trends. In the case of the former, a good and superimposable trend between the replicas was obtained for Taq:DNA:dGTP and Taq:DNA:1 in particular, in proximity of residues of the O-helix deputed to the recognition of the ligands (from residue 656 to residue 672, see **Figure S11**). Also the superposition of the most populated cluster geometries (see **Figure S12**) further did not highlight any relevant structural variation of the secondary structures.



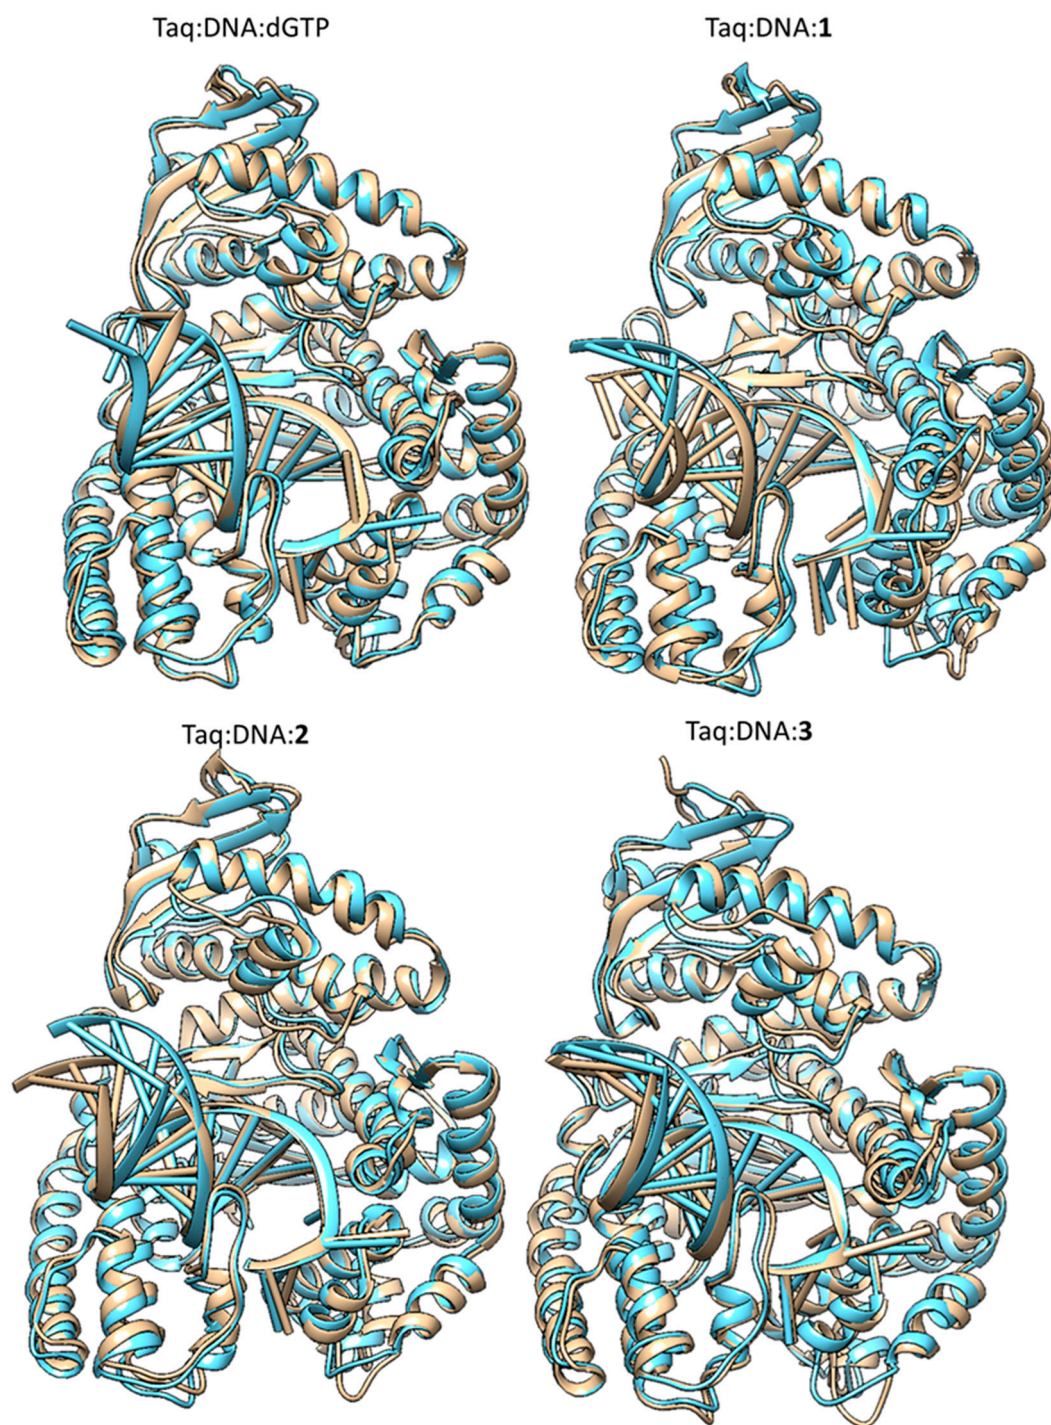

**Figure S12.** Superimposition of the most representative geometries obtained from hierarchical clustering procedure of replicas of the considered systems.



**Table S1.** Details of the ten clustered structures obtained from 200 ns of molecular dynamics simulation carried out for the investigated systems.

| Taq:DNA:dGTP |        |       |         |       |          |          | Taq:DNA:1 |        |       |         |       |          |          |
|--------------|--------|-------|---------|-------|----------|----------|-----------|--------|-------|---------|-------|----------|----------|
| Cluster      | Frames | Frac  | AvgDist | Stdev | Centroid | AvgCDist | Cluster   | Frames | Frac  | AvgDist | Stdev | Centroid | AvgCDist |
| 0            | 7429   | 0.371 | 1.126   | 0.147 | 3491     | 1.57     | 0         | 9164   | 0.458 | 1.187   | 0.155 | 15067    | 1.786    |
| 1            | 5397   | 0.27  | 1.124   | 0.153 | 16140    | 1.539    | 1         | 5018   | 0.251 | 1.164   | 0.161 | 7874     | 1.677    |
| 2            | 2502   | 0.125 | 1.077   | 0.157 | 18983    | 1.478    | 2         | 2869   | 0.143 | 1.188   | 0.169 | 2943     | 1.633    |
| 3            | 1499   | 0.075 | 1.059   | 0.129 | 8313     | 1.436    | 3         | 1088   | 0.054 | 1.122   | 0.148 | 364      | 1.831    |
| 4            | 1405   | 0.07  | 1.045   | 0.135 | 10719    | 1.472    | 4         | 706    | 0.035 | 1.095   | 0.172 | 1747     | 1.65     |
| 5            | 1086   | 0.054 | 1.063   | 0.166 | 11386    | 1.482    | 5         | 454    | 0.023 | 1.01    | 0.132 | 5336     | 1.815    |
| 6            | 365    | 0.018 | 1.045   | 0.163 | 9408     | 1.503    | 6         | 334    | 0.017 | 1.02    | 0.225 | 10851    | 2.028    |
| 7            | 181    | 0.009 | 0.82    | 0.101 | 5221     | 1.692    | 7         | 180    | 0.009 | 1.015   | 0.143 | 1320     | 1.826    |
| 8            | 116    | 0.006 | 0.922   | 0.063 | 7834     | 1.545    | 8         | 124    | 0.006 | 0.973   | 0.104 | 46       | 2.283    |
| 9            | 20     | 0.001 | 0       | 0     | 12954    | 1.784    | 9         | 63     | 0.003 | 0.965   | 0.258 | 2085     | 1.766    |

  

| Taq:DNA:2 |        |       |         |       |          |          | Taq:DNA:3 |        |       |         |       |          |          |
|-----------|--------|-------|---------|-------|----------|----------|-----------|--------|-------|---------|-------|----------|----------|
| Cluster   | Frames | Frac  | AvgDist | Stdev | Centroid | AvgCDist | Cluster   | Frames | Frac  | AvgDist | Stdev | Centroid | AvgCDist |
| 0         | 13410  | 0.67  | 1.087   | 0.127 | 17621    | 1.315    | 0         | 6143   | 0.323 | 1.067   | 0.131 | 8386     | 1.293    |
| 1         | 3968   | 0.198 | 1.124   | 0.139 | 3198     | 1.346    | 1         | 5327   | 0.28  | 1.019   | 0.109 | 15418    | 1.295    |
| 2         | 1268   | 0.063 | 1.043   | 0.128 | 441      | 1.504    | 2         | 4185   | 0.22  | 1.066   | 0.119 | 3451     | 1.313    |
| 3         | 609    | 0.03  | 0.924   | 0.103 | 11763    | 1.5      | 3         | 1292   | 0.068 | 1.011   | 0.12  | 1623     | 1.279    |
| 4         | 283    | 0.014 | 0.956   | 0.154 | 17076    | 1.426    | 4         | 897    | 0.047 | 0.972   | 0.127 | 478      | 1.35     |
| 5         | 207    | 0.01  | 0.971   | 0.147 | 6090     | 1.462    | 5         | 867    | 0.046 | 1.023   | 0.153 | 9172     | 1.38     |
| 6         | 153    | 0.008 | 0.901   | 0.129 | 4309     | 1.442    | 6         | 193    | 0.01  | 0.977   | 0.047 | 11185    | 1.434    |
| 7         | 46     | 0.002 | 1.032   | 0.173 | 8834     | 1.431    | 7         | 54     | 0.003 | 0.829   | 0.088 | 897      | 1.355    |
| 8         | 41     | 0.002 | 0.83    | 0.033 | 15191    | 1.499    | 8         | 29     | 0.002 | 0       | 0     | 16953    | 1.599    |
| 9         | 15     | 0.001 | 0       | 0     | 4749     | 1.485    | 9         | 14     | 0.001 | 0       | 0     | 8580     | 1.398    |

**Table S2.** Results of MMPBSA calculation and, in the next page, Per-residue decomposition analysis carried out for all investigated systems.

| Taq:DNA:dGTP     |                    |           |                   | Taq:DNA:1        |                    |           |                   |
|------------------|--------------------|-----------|-------------------|------------------|--------------------|-----------|-------------------|
| Energy Component | Average (kcal/mol) | Std. Dev. | Std. Err. Of Mean | Energy Component | Average (kcal/mol) | Std. Dev. | Std. Err. Of Mean |
| VDWAALS          | -30,5895           | 6,4703    | 0,647             | VDWAALS          | -16,8036           | 6,8919    | 0,6892            |
| EEL              | 50,7178            | 72,0463   | 7,2046            | EEL              | -464,87            | 58,0147   | 5,8015            |
| EPB              | -217,0776          | 59,6789   | 5,9679            | EPB              | 376,4979           | 49,8608   | 4,9861            |
| ENPOLAR          | -3,8233            | 0,0552    | 0,0055            | ENPOLAR          | -5,64              | 0,1595    | 0,016             |
| EDISPER          | 0                  | 0         | 0                 | EDISPER          | 0                  | 0         | 0                 |
| D G gas          | 20,1766            | 70,3387   | 7,0339            | D G gas          | -479,1343          | 58,2689   | 5,8269            |
| D G solv         | -220,9009          | 59,6974   | 5,9697            | D G solv         | 370,8578           | 49,846    | 4,9846            |
| D TOTAL          | -200,7243          | 14,1667   | 1,4167            | D TOTAL          | -108,2765          | 24,2667   | 2,4267            |

  

| Taq:DNA:2        |                    |           |                   | Taq:DNA:3        |                    |           |                   |
|------------------|--------------------|-----------|-------------------|------------------|--------------------|-----------|-------------------|
| Energy Component | Average (kcal/mol) | Std. Dev. | Std. Err. Of Mean | Energy Component | Average (kcal/mol) | Std. Dev. | Std. Err. Of Mean |
| VDWAALS          | -41,0381           | 5,8275    | 0,5828            | VDWAALS          | -40,2914           | 7,2343    | 0,7234            |
| EEL              | 141,7018           | 43,4112   | 4,3411            | EEL              | -79,3406           | 31,1848   | 3,1185            |
| EPB              | -202,5309          | 38,0495   | 3,8049            | EPB              | 29,1732            | 29,7848   | 2,9785            |
| ENPOLAR          | -4,8065            | 0,0971    | 0,0097            | ENPOLAR          | -4,8069            | 0,121     | 0,0121            |
| EDISPER          | 0                  | 0         | 0                 | EDISPER          | 0                  | 0         | 0                 |
| D G gas          | 100,6637           | 42,079    | 4,2079            | D G gas          | -119,632           | 31,2792   | 3,1279            |
| D G solv         | -207,3374          | 38,0494   | 3,8049            | D G solv         | 24,3662            | 29,7683   | 2,9768            |
| D TOTAL          | -106,6737          | 9,0736    | 0,9074            | D TOTAL          | -95,2657           | 9,3905    | 0,939             |

## Taq:DNA:dGTP

| Resid Number | $\Delta G$ internal<br>(kcal/mol) | $\Delta G$ vdw<br>(kcal/mol) | $\Delta G$ eel<br>(kcal/mol) | $\Delta G$ pol<br>(kcal/mol) | $\Delta G$ TOT<br>(kcal/mol) |
|--------------|-----------------------------------|------------------------------|------------------------------|------------------------------|------------------------------|
| R573         | 0                                 | -0,482                       | -62,407                      | 57,618                       | -5,271                       |
| D610         | 0                                 | -0,951                       | 145,217                      | -132,452                     | 11,814                       |
| Y611         | 0                                 | -0,722                       | 19,885                       | -14,951                      | 4,212                        |
| S612         | 0                                 | -1,199                       | -14                          | 11,632                       | -3,567                       |
| N613         | 0                                 | -1,933                       | -19,824                      | 14,504                       | -7,253                       |
| I614         | 0                                 | -1,529                       | -8,493                       | 6,414                        | -3,608                       |
| E615         | 0                                 | -1,504                       | 50,798                       | -41,045                      | 8,249                        |
| H639         | 0                                 | -1,498                       | -19,261                      | 14,951                       | -5,808                       |
| R659         | 0                                 | 0,151                        | -127,343                     | 108,912                      | -18,28                       |
| R660         | 0                                 | -0,108                       | -81,505                      | 73,89                        | -7,723                       |
| K663         | 0                                 | -1,006                       | -158,545                     | 140,663                      | -18,888                      |
| F667         | 0                                 | -3,143                       | -5,433                       | 5,047                        | -3,529                       |
| Y671         | 0                                 | -0,756                       | -1,533                       | 0,804                        | -1,485                       |
| Q754         | 0                                 | -0,669                       | -0,542                       | -0,223                       | -1,434                       |
| D785         | 0                                 | 0,593                        | 147,559                      | -128,492                     | 19,66                        |

## Taq:DNA:1

| Resid Number | $\Delta G$ internal<br>(kcal/mol) | $\Delta G$ vdw<br>(kcal/mol) | $\Delta G$ eel<br>(kcal/mol) | $\Delta G$ pol<br>(kcal/mol) | $\Delta G$ TOT<br>(kcal/mol) |
|--------------|-----------------------------------|------------------------------|------------------------------|------------------------------|------------------------------|
| R573         | 0                                 | -0,723                       | -35,935                      | 31,866                       | -4,069                       |
| D610         | 0                                 | 0,402                        | 127,891                      | -117,256                     | 10,635                       |
| E615         | 0                                 | 0,236                        | 44,809                       | -36,41                       | 8,399                        |
| K663         | 0                                 | -0,993                       | -81,605                      | 81,77                        | 0,165                        |
| F667         | 0                                 | -3,886                       | -1,435                       | 2,759                        | 1,324                        |
| Y671         | 0                                 | -0,817                       | -1,536                       | 1,373                        | -0,163                       |
| N750         | 0                                 | -0,271                       | 0,445                        | -0,865                       | -0,42                        |
| Q754         | 0                                 | -1,316                       | -3,169                       | 1,478                        | -1,691                       |
| H784         | 0                                 | -0,977                       | -0,325                       | 1,241                        | 0,916                        |
| D785         | 0                                 | -1,206                       | 127,557                      | -113,404                     | 14,153                       |

## Taq:DNA:2

| Resid Number | $\Delta G$ internal<br>(kcal/mol) | $\Delta G$ vdw<br>(kcal/mol) | $\Delta G$ eel<br>(kcal/mol) | $\Delta G$ pol<br>(kcal/mol) | $\Delta G$ TOT<br>(kcal/mol) |
|--------------|-----------------------------------|------------------------------|------------------------------|------------------------------|------------------------------|
| R573         | 0                                 | -1,034                       | -50,563                      | 49,916                       | -1,681                       |
| D610         | 0                                 | -0,988                       | 112,165                      | -106,401                     | 4,776                        |
| Y611         | 0                                 | -0,423                       | 15,648                       | -12,508                      | 2,717                        |
| S612         | 0                                 | -1,4                         | -12,007                      | 11,01                        | -2,397                       |
| N613         | 0                                 | -0,996                       | -14,656                      | 13,088                       | -2,564                       |
| I614         | 0                                 | -1,939                       | -5,967                       | 5,158                        | -2,748                       |
| E615         | 0                                 | -1,708                       | 43,88                        | -37,804                      | 4,368                        |
| H639         | 0                                 | -1,4                         | -15,216                      | 12,318                       | -4,298                       |
| R659         | 0                                 | -0,036                       | -97,172                      | 86,508                       | -10,7                        |
| R660         | 0                                 | -0,213                       | -47,285                      | 45,826                       | -1,672                       |
| K663         | 0                                 | -0,992                       | -115,588                     | 107,621                      | -8,959                       |
| T664         | 0                                 | -0,615                       | 0,281                        | 1,179                        | 0,845                        |
| F667         | 0                                 | -3,712                       | -4,612                       | 4,288                        | -4,036                       |
| Y671         | 0                                 | -0,912                       | -0,288                       | 0,158                        | -1,042                       |
| Q754         | 0                                 | -0,728                       | -2,868                       | 0,479                        | -3,117                       |
| D785         | 0                                 | -1,045                       | 105,871                      | -97,417                      | 7,409                        |

## Taq:DNA:3

| Resid Number | $\Delta G$ internal<br>(kcal/mol) | $\Delta G$ vdw<br>(kcal/mol) | $\Delta G$ eel<br>(kcal/mol) | $\Delta G$ pol<br>(kcal/mol) | $\Delta G$ TOT<br>(kcal/mol) |
|--------------|-----------------------------------|------------------------------|------------------------------|------------------------------|------------------------------|
| R573         | 0                                 | -0,579                       | -31,388                      | 27,441                       | -4,526                       |
| D610         | 0                                 | -0,599                       | 93,879                       | -91,475                      | 1,805                        |
| Y611         | 0                                 | -0,844                       | 12,952                       | -11,749                      | 0,359                        |
| S612         | 0                                 | -1,128                       | -10,15                       | 9,32                         | -1,958                       |
| N613         | 0                                 | -2,065                       | -12,516                      | 11,309                       | -3,272                       |
| I614         | 0                                 | -2,001                       | -6,058                       | 5,243                        | -2,816                       |
| E615         | 0                                 | -2,437                       | 28,489                       | -18,935                      | 7,117                        |
| H639         | 0                                 | -1,208                       | -11,017                      | 10,735                       | -1,49                        |
| R659         | 0                                 | -0,05                        | -69,949                      | 63,986                       | -6,013                       |
| R660         | 0                                 | -0,368                       | -30,894                      | 30,703                       | -0,559                       |
| K663         | 0                                 | -0,075                       | -94,831                      | 84,106                       | -10,8                        |
| F667         | 0                                 | -3,815                       | -3,196                       | 2,591                        | -4,42                        |
| Y671         | 0                                 | -0,825                       | -0,666                       | 0,181                        | -1,31                        |
| Q754         | 0                                 | -1,048                       | -0,768                       | -0,363                       | -2,179                       |
| D785         | 0                                 | -0,164                       | 89,443                       | -86,925                      | 2,354                        |

## Parameters in Amber16 format

3 O2 22.0670 8.4040 0.6850 o 1  
MOL -0.960167

## Parameters complex 1

4 O3 20.1600 6.7270 0.5290 o 1  
MOL -0.960167

## File mol2:

@<TRIPOS>MOLECULE

MOL

64 64 1 0 0

SMALL

bcc

@<TRIPOS>ATOM

1 P1 20.9120 7.7260 1.3950 p5 1

MOL 1.460900

2 O1 20.0490 8.6620 2.2080 o 1

MOL -0.960167

5 O4 21.4390 6.7790 2.5730 os 1  
MOL -0.814800

6 P2 22.9680 6.3840 2.8980 p5 1  
MOL 1.716800

7 O5 22.8700 5.1690 3.7780 o 1  
MOL -0.944500

8 O6 23.8440 6.3660 1.7030 o 1  
MOL -0.944500

9 O7 23.3530 7.5350 3.9730 os 1  
MOL -0.817800

10 P3 24.3560 8.7590 3.6350 p5 1  
MOL 1.611800

|        |           |        |           |   |        |           |         |            |   |
|--------|-----------|--------|-----------|---|--------|-----------|---------|------------|---|
| 11 O8  | 23.8860   | 9.8320 | 4.5720 o  | 1 | 28 C9  | 27.3280   | 4.9180  | 10.8510 cd | 1 |
| MOL    | -0.926500 |        |           |   | MOL    | 0.545800  |         |            |   |
| 12 O9  | 24.4740   | 8.9970 | 2.1750 o  | 1 | 29 N4  | 27.9970   | 3.8790  | 11.4040 nh | 1 |
| MOL    | -0.926500 |        |           |   | MOL    | -0.862800 |         |            |   |
| 13 O10 | 25.7280   | 8.1780 | 4.2120 os | 1 | 30 N5  | 27.5110   | 5.1290  | 9.5380 nc  | 1 |
| MOL    | -0.603200 |        |           |   | MOL    | -0.596100 |         |            |   |
| 14 C1  | 26.5990   | 7.3450 | 3.4680 c3 | 1 | 31 C10 | 26.8720   | 6.1500  | 8.9400 cc  | 1 |
| MOL    | 0.194400  |        |           |   | MOL    | 0.016800  |         |            |   |
| 15 C2  | 27.1220   | 6.2410 | 4.3650 c3 | 1 | 32 C11 | 23.9650   | 9.4640  | 11.6690 c3 | 1 |
| MOL    | 0.093100  |        |           |   | MOL    | 0.144300  |         |            |   |
| 16 O11 | 27.8070   | 6.7860 | 5.5060 os | 1 | 33 C12 | 24.0130   | 11.4100 | 7.2970 c3  | 1 |
| MOL    | -0.453600 |        |           |   | MOL    | 0.144300  |         |            |   |
| 17 C3  | 26.0340   | 5.3420 | 4.9500 c3 | 1 | 34 N6  | 25.1670   | 10.9030 | 7.9230 Y2  | 1 |
| MOL    | 0.148100  |        |           |   | MOL    | -0.931800 |         |            |   |
| 18 O12 | 25.6780   | 4.2710 | 4.0760 oh | 1 | 35 N7  | 23.6430   | 8.2890  | 10.9800 Y3 | 1 |
| MOL    | -0.686800 |        |           |   | MOL    | -0.931800 |         |            |   |
| 19 C4  | 26.7350   | 4.8090 | 6.1630 c3 | 1 | 36 C13 | 23.0130   | 10.4220 | 11.1140 c3 | 1 |
| MOL    | -0.113400 |        |           |   | MOL    | 0.171300  |         |            |   |
| 20 C5  | 27.6250   | 5.9470 | 6.6250 c3 | 1 | 37 C14 | 23.2640   | 11.5480 | 8.4720 c3  | 1 |
| MOL    | 0.250800  |        |           |   | MOL    | 0.171300  |         |            |   |
| 21 N1  | 26.8590   | 6.5940 | 7.7210 na | 1 | 38 N8  | 22.8980   | 10.8800 | 9.6470 Y4  | 1 |
| MOL    | -0.167900 |        |           |   | MOL    | -0.861200 |         |            |   |
| 22 C6  | 26.0230   | 7.6410 | 7.6390 cc | 1 | 39 H1  | 27.4350   | 7.9350  | 3.0920 h1  | 1 |
| MOL    | 0.482400  |        |           |   | MOL    | 0.028200  |         |            |   |
| 23 N2  | 25.4980   | 7.9260 | 8.8270 Y1 | 1 | 40 H2  | 26.0560   | 6.9070  | 2.6300 h1  | 1 |
| MOL    | -0.647000 |        |           |   | MOL    | 0.028200  |         |            |   |
| 24 C7  | 25.9650   | 7.0220 | 9.6940 cd | 1 | 41 H3  | 27.8190   | 5.6260  | 3.7960 h1  | 1 |
| MOL    | 0.212800  |        |           |   | MOL    | 0.061700  |         |            |   |
| 25 C8  | 25.8140   | 6.7290 | 11.1130 c | 1 | 42 H4  | 25.1560   | 5.9240  | 5.2310 h1  | 1 |
| MOL    | 0.641000  |        |           |   | MOL    | 0.180700  |         |            |   |
| 26 O13 | 25.0580   | 7.4180 | 11.8400 o | 1 | 43 H5  | 27.3320   | 3.9330  | 5.9080 hc  | 1 |
| MOL    | -0.667500 |        |           |   | MOL    | 0.064700  |         |            |   |
| 27 N3  | 26.5120   | 5.6870 | 11.6080 n | 1 | 44 H6  | 26.0100   | 4.5590  | 6.9380 hc  | 1 |
| MOL    | -0.491400 |        |           |   | MOL    | 0.064700  |         |            |   |

|        |           |         |            |   |               |          |         |           |   |
|--------|-----------|---------|------------|---|---------------|----------|---------|-----------|---|
| 45 H7  | 28.5810   | 5.5700  | 6.9880 h2  | 1 | 62 H24        | 23.5770  | 10.6990 | 6.6270 h1 | 1 |
| MOL    | 0.052700  |         |            |   | MOL           | 0.034950 |         |           |   |
| 46 H8  | 25.8060   | 8.1800  | 6.7290 h5  | 1 | 63 H25        | 25.3260  | 11.3960 | 8.7780 hn | 1 |
| MOL    | 0.172100  |         |            |   | MOL           | 0.372800 |         |           |   |
| 47 H9  | 26.4210   | 5.4700  | 12.5900 hn | 1 | 64 PT         | 24.2490  | 9.4200  | 9.2380 M1 | 1 |
| MOL    | 0.313500  |         |            |   | MOL           | 2.000000 |         |           |   |
| 48 H10 | 24.9930   | 9.7690  | 11.4700 h1 | 1 | @<TRIPOS>BOND |          |         |           |   |
| MOL    | 0.034950  |         |            |   | 1             | 1        | 2       | 1         |   |
| 49 H11 | 23.8020   | 9.3380  | 12.7390 h1 | 1 | 2             | 1        | 3       | 1         |   |
| MOL    | 0.034950  |         |            |   | 3             | 1        | 4       | 1         |   |
| 50 H12 | 24.1960   | 12.3540 | 6.8270 h1  | 1 | 4             | 1        | 5       | 1         |   |
| MOL    | 0.034950  |         |            |   | 5             | 5        | 6       | 1         |   |
| 51 H13 | 23.1760   | 11.3390 | 11.6810 h1 | 1 | 6             | 6        | 7       | 1         |   |
| MOL    | -0.005050 |         |            |   | 7             | 6        | 8       | 1         |   |
| 52 H14 | 22.0230   | 10.0640 | 11.3970 h1 | 1 | 8             | 6        | 9       | 1         |   |
| MOL    | -0.005050 |         |            |   | 9             | 9        | 10      | 1         |   |
| 53 H15 | 22.3050   | 11.8120 | 8.0770 h1  | 1 | 10            | 10       | 11      | 1         |   |
| MOL    | -0.005050 |         |            |   | 11            | 10       | 12      | 1         |   |
| 54 H16 | 22.0440   | 10.4230 | 9.3600 hn  | 1 | 12            | 10       | 13      | 1         |   |
| MOL    | 0.454800  |         |            |   | 13            | 13       | 14      | 1         |   |
| 55 H17 | 28.6020   | 3.3070  | 10.8330 hn | 1 | 14            | 14       | 15      | 1         |   |
| MOL    | 0.366800  |         |            |   | 15            | 14       | 39      | 1         |   |
| 56 H18 | 27.8910   | 3.6760  | 12.3880 hn | 1 | 16            | 14       | 40      | 1         |   |
| MOL    | 0.366800  |         |            |   | 17            | 15       | 16      | 1         |   |
| 57 H19 | 22.9190   | 7.7940  | 11.4800 hn | 1 | 18            | 15       | 17      | 1         |   |
| MOL    | 0.372800  |         |            |   | 19            | 15       | 41      | 1         |   |
| 58 H20 | 23.3140   | 8.5210  | 10.0540 hn | 1 | 20            | 16       | 20      | 1         |   |
| MOL    | 0.372800  |         |            |   | 21            | 17       | 18      | 1         |   |
| 59 H21 | 24.7370   | 4.3100  | 3.8880 ho  | 1 | 22            | 17       | 19      | 1         |   |
| MOL    | 0.493000  |         |            |   |               |          |         |           |   |
| 60 H22 | 25.9540   | 11.0230 | 7.3180 hn  | 1 |               |          |         |           |   |
| MOL    | 0.372800  |         |            |   |               |          |         |           |   |
| 61 H23 | 23.6650   | 12.4580 | 8.8670 h1  | 1 |               |          |         |           |   |
| MOL    | -0.005050 |         |            |   |               |          |         |           |   |



23 17 42 1  
 24 18 59 1  
 25 19 20 1  
 26 19 43 1  
 27 19 44 1  
 28 20 21 1  
 29 20 45 1  
 30 21 22 1  
 31 21 31 1  
 32 22 23 2  
 33 22 46 1  
 34 23 24 1  
 35 24 25 1  
 36 24 31 2  
 37 25 26 2  
 38 25 27 1  
 39 27 28 1  
 40 27 47 1  
 41 28 29 1  
 42 28 30 2  
 43 29 55 1  
 44 29 56 1  
 45 30 31 1  
 46 32 35 1  
 47 32 36 1  
 48 32 48 1  
 49 32 49 1  
 50 33 34 1

51 33 37 1  
 52 33 50 1  
 53 33 62 1  
 54 34 60 1  
 55 34 63 1  
 56 35 57 1  
 57 35 58 1  
 58 36 38 1  
 59 36 51 1  
 60 36 52 1  
 61 37 38 1  
 62 37 53 1  
 63 37 61 1  
 64 38 54 1

@<TRIPOS>SUBSTRUCTURE

1 MOL 1 TEMP 0 \*\*\*\*\* 0 ROOT

**File frcmod:**

remark goes here

MASS

p5 30.970 1.538

o 16.000 0.434

os 16.000 0.465

c3 12.010 0.878

oh 16.000 0.465

na 14.010 0.530

cc 12.010 0.360

cd 12.010 0.360

|       |        |       |                                                     |       |        |        |                                           |
|-------|--------|-------|-----------------------------------------------------|-------|--------|--------|-------------------------------------------|
| c     | 12.010 | 0.616 |                                                     | c3-na | 262.85 | 1.463  |                                           |
| n     | 14.010 | 0.530 |                                                     | c3-h2 | 377.33 | 1.096  |                                           |
| nh    | 14.010 | 0.530 |                                                     | na-cc | 354.49 | 1.380  |                                           |
| nc    | 14.010 | 0.530 |                                                     | cc-h5 | 403.49 | 1.082  |                                           |
| h1    | 1.008  | 0.135 |                                                     | cd-c  | 295.35 | 1.468  |                                           |
| hc    | 1.008  | 0.135 |                                                     | cd-cc | 416.13 | 1.373  |                                           |
| h2    | 1.008  | 0.135 |                                                     | c-o   | 652.57 | 1.218  |                                           |
| h5    | 1.008  | 0.135 |                                                     | c-n   | 356.21 | 1.379  |                                           |
| hn    | 1.008  | 0.161 |                                                     | n-cd  | 353.83 | 1.381  |                                           |
| ho    | 1.008  | 0.135 |                                                     | n-hn  | 527.31 | 1.013  |                                           |
| M1    | 195.08 |       |                                                     | cd-nh | 363.47 | 1.373  |                                           |
| Y1    | 14.01  | 0.530 | Sp2 N in non-pure aromatic systems, identical to nc | cd-nc | 450.71 | 1.317  |                                           |
| Y2    | 14.01  | 0.530 | Sp3 N with three connected atoms                    | nh-hn | 529.46 | 1.012  |                                           |
| Y3    | 14.01  | 0.530 | Sp3 N with three connected atoms                    | nc-cc | 369.10 | 1.369  |                                           |
| Y4    | 14.01  | 0.530 | Sp3 N with three connected atoms                    | Y1-M1 | 80.2   | 2.1471 | Created by Seminario method using MCPB.py |
|       |        |       |                                                     | na-M1 | 80.2   | 2.1471 | Created by Seminario method using MCPB.py |
|       |        |       |                                                     | o-M1  | 80.2   | 2.1471 | Created by Seminario method using MCPB.py |
| BOND  |        |       |                                                     | Y2-M1 | 107.7  | 2.1129 | Created by Seminario method using MCPB.py |
| p5-o  | 529.55 | 1.487 |                                                     | os-M1 | 80.2   | 2.1471 | Created by Seminario method using MCPB.py |
| p5-os | 346.25 | 1.615 |                                                     | Y3-M1 | 120.0  | 2.0740 | Created by Seminario method using MCPB.py |
| os-c3 | 284.76 | 1.432 |                                                     | Y4-M1 | 166.0  | 2.0051 | Created by Seminario method using MCPB.py |
| c3-c3 | 232.52 | 1.538 |                                                     | Y1-cd | 441.1  | 1.3694 | SOURCE1_SOURCE5                           |
| c3-h1 | 375.92 | 1.097 |                                                     |       | 2269   | 0.0086 |                                           |
| c3-oh | 293.40 | 1.423 |                                                     |       |        |        |                                           |
| oh-ho | 563.51 | 0.973 |                                                     |       |        |        |                                           |
| c3-hc | 375.92 | 1.097 |                                                     |       |        |        |                                           |

|          |         |         |                 |          |         |         |
|----------|---------|---------|-----------------|----------|---------|---------|
| Y2-hn    | 392.4   | 1.0190  | SOURCE3_SOURCE5 | os-c3-Y1 | 109.296 | 109.030 |
| 5944     | 0.0012  |         |                 | os-c3-h2 | 62.442  | 109.580 |
| Y3-hn    | 392.4   | 1.0190  | SOURCE3_SOURCE5 | c3-oh-ho | 49.027  | 107.260 |
| 5944     | 0.0012  |         |                 | c3-c3-hc | 46.816  | 109.800 |
| Y4-hn    | 392.4   | 1.0190  | SOURCE3_SOURCE5 | oh-c3-h1 | 62.540  | 110.260 |
| 5944     | 0.0012  |         |                 | c3-c3-na | 82.668  | 112.880 |
| c3-Y2    | 325.9   | 1.4647  | SOURCE1_SOURCE5 | c3-c3-h2 | 46.730  | 110.220 |
| 15206    | 0.0039  |         |                 | c3-na-cc | 63.695  | 126.460 |
| c3-Y3    | 325.9   | 1.4647  | SOURCE1_SOURCE5 | c3-Y1-cc | 63.695  | 126.460 |
| 15206    | 0.0039  |         |                 | na-c3-h2 | 61.963  | 107.310 |
| c3-Y4    | 325.9   | 1.4647  | SOURCE1_SOURCE5 | na-cc-h5 | 61.226  | 121.550 |
| 15206    | 0.0039  |         |                 | na-cc-cd | 92.653  | 106.990 |
| cc-Y1    | 525.4   | 1.3172  | SOURCE3_SOURCE5 | Y1-cc-cd | 92.653  | 106.990 |
| 4612     | 0.0083  |         |                 | na-cc-nc | 108.812 | 121.950 |
| c3-Y1    | 525.4   | 1.3172  | SOURCE3_SOURCE5 | Y1-cc-nc | 108.812 | 121.950 |
| 4612     | 0.0083  |         |                 | cc-na-cc | 70.492  | 109.900 |
| ANGLE    |         |         |                 | cd-c -o  | 86.736  | 123.930 |
| p5-os-p5 | 106.787 | 126.250 |                 | cd-c -n  | 87.145  | 112.700 |
| o -p5-o  | 85.510  | 115.800 |                 | cd-cc-nc | 91.057  | 111.650 |
| o -p5-os | 81.819  | 115.460 |                 | c -cd-cc | 67.187  | 121.350 |
| os-p5-os | 83.949  | 101.840 |                 | c -n -cd | 66.579  | 123.270 |
| p5-os-c3 | 83.251  | 119.540 |                 | c -n -hn | 48.691  | 117.550 |
| os-c3-c3 | 85.306  | 107.970 |                 | o -c -n  | 113.811 | 123.050 |
| p5-o-c3  | 83.251  | 119.540 |                 | n -cd-nh | 110.935 | 116.940 |
| os-c3-h1 | 62.377  | 109.780 |                 | n -cd-nc | 110.304 | 123.000 |
| c3-c3-c3 | 64.888  | 111.510 |                 | cd-n -hn | 48.285  | 119.260 |
| c3-c3-h1 | 46.868  | 109.560 |                 | cd-nh-hn | 49.267  | 115.630 |
| c3-os-c3 | 66.293  | 112.480 |                 | cd-nc-cc | 73.871  | 105.490 |
| c3-c3-oh | 84.642  | 110.190 |                 |          |         |         |
| os-c3-na | 109.296 | 109.030 |                 |          |         |         |

|          |         |         |                                              |                 |  |
|----------|---------|---------|----------------------------------------------|-----------------|--|
| nh-cd-nc | 111.697 | 120.650 |                                              |                 |  |
| h1-c3-h1 | 38.802  | 108.460 |                                              |                 |  |
| hc-c3-hc | 38.960  | 107.580 |                                              |                 |  |
| hn-nh-hn | 39.519  | 115.120 |                                              |                 |  |
| M1-Y1-cd | 183.02  | 128.65  | Created by Seminario<br>method using MCPB.py |                 |  |
| M1-Y2-hn | 65.00   | 112.03  | Created by Seminario<br>method using MCPB.py |                 |  |
| M1-Y3-hn | 61.05   | 107.39  | Created by Seminario<br>method using MCPB.py |                 |  |
| M1-Y4-hn | 6.91    | 75.07   | Created by Seminario<br>method using MCPB.py |                 |  |
| Y1-M1-Y2 | 182.93  | 101.20  | Created by Seminario<br>method using MCPB.py |                 |  |
| Y1-M1-Y3 | 183.35  | 92.13   | Created by Seminario<br>method using MCPB.py |                 |  |
| Y1-M1-Y4 | 159.20  | 174.42  | Created by Seminario<br>method using MCPB.py |                 |  |
| Y2-M1-Y3 | 150.16  | 166.59  | Created by Seminario<br>method using MCPB.py |                 |  |
| Y2-M1-Y4 | 141.81  | 82.68   | Created by Seminario<br>method using MCPB.py |                 |  |
| Y3-M1-Y4 | 143.98  | 83.92   | Created by Seminario<br>method using MCPB.py |                 |  |
| c3-Y2-M1 | 159.25  | 107.57  | Created by Seminario<br>method using MCPB.py |                 |  |
| na-M1-Y1 | 182.93  | 101.20  | Created by Seminario<br>method using MCPB.py |                 |  |
| na-M1-Y2 | 183.35  | 92.13   | Created by Seminario<br>method using MCPB.py |                 |  |
| na-M1-Y3 | 159.20  | 174.42  | Created by Seminario<br>method using MCPB.py |                 |  |
| na-M1-Y4 | 150.16  | 166.59  | Created by Seminario<br>method using MCPB.py |                 |  |
| c3-Y3-M1 | 135.52  | 107.32  | Created by Seminario<br>method using MCPB.py |                 |  |
| c3-Y4-M1 | 149.84  | 109.73  | Created by Seminario<br>method using MCPB.py |                 |  |
| cc-Y1-M1 | 152.18  | 123.14  | Created by Seminario<br>method using MCPB.py |                 |  |
| cc-na-M1 | 152.18  | 123.14  | Created by Seminario<br>method using MCPB.py |                 |  |
| c3-na-M1 | 152.18  | 123.14  | Created by Seminario<br>method using MCPB.py |                 |  |
| c3-Y1-M1 | 152.18  | 123.14  | Created by Seminario<br>method using MCPB.py |                 |  |
| Y1-cd-c  | 66.22   | 123.32  |                                              | CORR_SOURCE5    |  |
| 27       | 2.2025  |         |                                              |                 |  |
| Y1-cd-cc | 72.17   | 111.65  |                                              | CORR_SOURCE5    |  |
| 1656     | 1.8430  |         |                                              |                 |  |
| c3-Y2-hn | 47.42   | 109.29  |                                              | SOURCE3_SOURCE5 |  |
| 6742     | 0.6614  |         |                                              |                 |  |
| c3-Y3-hn | 47.42   | 109.29  |                                              | SOURCE3_SOURCE5 |  |
| 6742     | 0.6614  |         |                                              |                 |  |
| c3-Y4-c3 | 63.82   | 112.35  |                                              | SOURCE3_SOURCE5 |  |
| 10425    | 1.3688  |         |                                              |                 |  |
| c3-Y4-hn | 47.42   | 109.29  |                                              | SOURCE3_SOURCE5 |  |
| 6742     | 0.6614  |         |                                              |                 |  |
| c3-c3-Y2 | 66.02   | 111.04  |                                              | SOURCE3_SOURCE5 |  |
| 12086    | 1.5519  |         |                                              |                 |  |
| c3-c3-Y3 | 66.02   | 111.04  |                                              | SOURCE3_SOURCE5 |  |
| 12086    | 1.5519  |         |                                              |                 |  |
| c3-c3-Y4 | 66.02   | 111.04  |                                              | SOURCE3_SOURCE5 |  |
| 12086    | 1.5519  |         |                                              |                 |  |
| c3-c3-Y1 | 66.02   | 111.04  |                                              | SOURCE3_SOURCE5 |  |
| 12086    | 1.5519  |         |                                              |                 |  |



|             |        |         |                 |        |             |   |       |         |        |
|-------------|--------|---------|-----------------|--------|-------------|---|-------|---------|--------|
| cc-Y1-cd    | 71.76  | 105.49  | CORR_SOURCE5    |        | o -p5-os-p5 | 1 | 0.550 | 0.000   | 3.000  |
| 1810        | 1.9032 |         |                 |        | os-c3-c3-os | 1 | 0.000 | 0.000   | -3.000 |
| h1-c3-Y2    | 49.53  | 109.88  | SOURCE3_SOURCE5 |        | os-c3-c3-os | 1 | 0.000 | 180.000 | -2.000 |
| 20428       | 1.2681 |         |                 |        | os-c3-c3-os | 1 | 0.170 | 180.000 | 1.000  |
| h1-c3-Y3    | 49.53  | 109.88  | SOURCE3_SOURCE5 |        | os-c3-c3-c3 | 1 | 0.156 | 0.000   | 3.000  |
| 20428       | 1.2681 |         |                 |        | os-c3-c3-h1 | 1 | 0.000 | 0.000   | -3.000 |
| h1-c3-Y4    | 49.53  | 109.88  | SOURCE3_SOURCE5 |        | os-c3-c3-h1 | 1 | 0.250 | 0.000   | 1.000  |
| 20428       | 1.2681 |         |                 |        | c3-c3-os-c3 | 1 | 0.240 | 0.000   | -3.000 |
| h5-cc-Y1    | 50.58  | 125.52  | SOURCE3_SOURCE5 |        | c3-c3-os-c3 | 1 | 0.160 | 0.000   | 2.000  |
| 1309        | 0.7276 |         |                 |        | c3-c3-c3-oh | 1 | 0.210 | 0.000   | 3.000  |
| hn-Y2-hn    | 41.40  | 106.40  | SOURCE3_SOURCE5 |        | c3-c3-c3-c3 | 1 | 0.130 | 0.000   | -3.000 |
| 2019        | 0.9777 |         |                 |        | c3-c3-c3-c3 | 1 | 0.290 | 180.000 | -2.000 |
| hn-Y3-hn    | 41.40  | 106.40  | SOURCE3_SOURCE5 |        | c3-c3-c3-c3 | 1 | 0.110 | 0.000   | 1.000  |
| 2019        | 0.9777 |         |                 |        | c3-c3-c3-h1 | 1 | 0.156 | 0.000   | 3.000  |
| na-cc-Y1    | 74.90  | 112.22  | SOURCE3_SOURCE5 |        | c3-os-c3-na | 1 | 0.383 | 0.000   | -3.000 |
| 2726        | 1.5103 |         |                 |        | c3-os-c3-na | 1 | 0.650 | 0.000   | 2.000  |
| cc-Y1-cc    | 71.76  | 105.49  | CORR_SOURCE5    |        | c3-os-c3-h2 | 1 | 0.383 | 0.000   | 3.000  |
| 1810        | 1.9032 |         |                 |        | c3-c3-oh-ho | 1 | 0.000 | 0.000   | 3.000  |
| Y1-c3-h2    | 61.963 | 107.310 |                 |        | c3-c3-c3-hc | 1 | 0.080 | 0.000   | 3.000  |
| DIHE        |        |         |                 |        | os-c3-c3-oh | 1 | 1.010 | 0.000   | -3.000 |
| p5-os-c3-c3 | 1      | 0.383   | 0.000           | -3.000 | os-c3-c3-oh | 1 | 0.000 | 0.000   | -2.000 |
| p5-os-p5-o  | 1      | 0.800   | 0.000           | 2.000  | os-c3-c3-oh | 1 | 0.020 | 180.000 | 1.000  |
| p5-os-p5-os | 1      | 0.800   | 0.000           | 2.000  | os-c3-c3-hc | 1 | 0.000 | 0.000   | -3.000 |
| os-p5-os-c3 | 1      | 0.000   | 0.000           | -3.000 | os-c3-c3-hc | 1 | 0.250 | 0.000   | 1.000  |
| os-p5-os-c3 | 1      | 2.610   | 0.000           | 2.000  | os-c3-na-cc | 1 | 0.000 | 0.000   | 2.000  |
| p5-os-c3-c3 | 1      | 3.950   | 180.000         | 1.000  | os-c3-Y1-cc | 1 | 0.000 | 0.000   | 2.000  |
| p5-os-c3-h1 | 1      | 0.217   | 0.000           | 3.000  | os-c3-Y1-M1 | 1 | 0.000 | 0.000   | 2.000  |
| o -p5-os-c3 | 1      | 0.800   | 0.000           | -2.000 | c3-c3-c3-na | 1 | 0.156 | 0.000   | 3.000  |
| o -p5-os-c3 | 1      | 0.800   | 0.000           | -2.000 |             |   |       |         |        |
| o -p5-os-p5 | 1      | 0.550   | 0.000           | 3.000  |             |   |       |         |        |

|              |   |       |         |        |             |   |       |         |       |                                |
|--------------|---|-------|---------|--------|-------------|---|-------|---------|-------|--------------------------------|
| c3-c3-c3-h2  | 1 | 0.156 | 0.000   | 3.000  | n -c -cd-cc | 1 | 2.875 | 180.000 | 2.000 |                                |
| oh-c3-c3-h1  | 1 | 0.000 | 0.000   | -3.000 | n -cd-nh-hn | 1 | 1.050 | 180.000 | 2.000 |                                |
| oh-c3-c3-h1  | 1 | 0.250 | 0.000   | 1.000  | n -cd-nc-cc | 1 | 4.750 | 180.000 | 2.000 |                                |
| oh-c3-c3-hc  | 1 | 0.180 | 0.000   | -3.000 | nh-cd-n -hn | 1 | 1.650 | 180.000 | 2.000 |                                |
| oh-c3-c3-hc  | 1 | 0.510 | 0.000   | 1.000  | nh-cd-nc-cc | 1 | 4.750 | 180.000 | 2.000 |                                |
| c3-c3-na-cc  | 1 | 0.000 | 0.000   | 2.000  | nc-cd-n -hn | 1 | 1.650 | 180.000 | 2.000 |                                |
| c3-os-c3-h1  | 1 | 0.337 | 0.000   | 3.000  | nc-cd-nh-hn | 1 | 1.050 | 180.000 | 2.000 |                                |
| #c3-na-cc-nd | 1 | 1.700 | 180.000 | 2.000  | cc-na-cc-h5 | 1 | 1.700 | 180.000 | 2.000 |                                |
| c3-na-cc-h5  | 1 | 1.700 | 180.000 | 2.000  | cc-Y1-c3-h2 | 1 | 1.700 | 180.000 | 2.000 |                                |
| c3-na-cc-cd  | 1 | 1.700 | 180.000 | 2.000  | h1-c3-c3-h1 | 1 | 0.156 | 0.000   | 3.000 |                                |
| c3-na-cc-nc  | 1 | 1.700 | 180.000 | 2.000  | h1-c3-oh-ho | 1 | 0.113 | 0.000   | 3.000 |                                |
| na-c3-c3-hc  | 1 | 0.156 | 0.000   | 3.000  | h1-c3-c3-hc | 1 | 0.156 | 0.000   | 3.000 |                                |
| na-cc-cd-c   | 1 | 4.000 | 180.000 | 2.000  | hc-c3-c3-h2 | 1 | 0.156 | 0.000   | 3.000 |                                |
| na-cc-nc-cd  | 1 | 4.750 | 180.000 | 2.000  | X -Y1-cd-X  | 2 | 9.5   | 180.0   | 2.0   | statistiv value<br>from parm94 |
| cc-na-c3-h2  | 1 | 0.000 | 0.000   | 2.000  | X -c3-Y2-X  | 6 | 1.8   | 0.0     | 3.0   | Junmei et al,<br>1999          |
| cc-na-cc-cd  | 1 | 1.700 | 180.000 | 2.000  | X -c3-Y3-X  | 6 | 1.8   | 0.0     | 3.0   | Junmei et al,<br>1999          |
| cc-na-cc-nc  | 1 | 1.700 | 180.000 | 2.000  | X -c3-Y4-X  | 6 | 1.8   | 0.0     | 3.0   | Junmei et al,<br>1999          |
| nd-cd-cc-nc  | 1 | 4.000 | 180.000 | 2.000  | X -cc-Y1-X  | 2 | 9.5   | 180.0   | 2.0   | statistic value<br>from parm94 |
| cd-c -n -cd  | 1 | 2.500 | 180.000 | 2.000  | M1-Y1-cd-c  | 3 | 0.00  | 0.00    | 3.0   | Treat as zero<br>by MCPB.py    |
| cd-c -n -hn  | 1 | 2.500 | 180.000 | 2.000  | M1-Y1-cd-cc | 3 | 0.00  | 0.00    | 3.0   | Treat as zero<br>by MCPB.py    |
| cd-cc-nc-cd  | 1 | 4.750 | 180.000 | 2.000  | Y1-M1-Y2-c3 | 3 | 0.00  | 0.00    | 3.0   | Treat as zero<br>by MCPB.py    |
| c -cd-cc-nc  | 1 | 4.000 | 180.000 | 2.000  | Y1-M1-Y2-hn | 3 | 0.00  | 0.00    | 3.0   | Treat as zero<br>by MCPB.py    |
| c -n -cd-nh  | 1 | 1.650 | 180.000 | 2.000  |             |   |       |         |       |                                |
| c -n -cd-nc  | 1 | 1.650 | 180.000 | 2.000  |             |   |       |         |       |                                |
| o -c -cd-cc  | 1 | 2.875 | 180.000 | 2.000  |             |   |       |         |       |                                |
| o -c -n -cd  | 1 | 2.500 | 180.000 | 2.000  |             |   |       |         |       |                                |
| o -c -n -hn  | 1 | 2.500 | 180.000 | -2.000 |             |   |       |         |       |                                |
| o -c -n -hn  | 1 | 2.000 | 0.000   | 1.000  |             |   |       |         |       |                                |

|                           |   |      |      |     |               |                           |   |      |       |      |                       |
|---------------------------|---|------|------|-----|---------------|---------------------------|---|------|-------|------|-----------------------|
| Y1-M1-Y3-c3<br>by MCPB.py | 3 | 0.00 | 0.00 | 3.0 | Treat as zero | c3-na-M1-Y4<br>by MCPB.py | 3 | 0.00 | 0.00  | 3.0  | Treat as zero         |
| Y1-M1-Y3-hn<br>by MCPB.py | 3 | 0.00 | 0.00 | 3.0 | Treat as zero | c3-na-M1-Y2<br>by MCPB.py | 3 | 0.00 | 0.00  | 3.0  | Treat as zero         |
| Y1-M1-Y4-c3<br>by MCPB.py | 3 | 0.00 | 0.00 | 3.0 | Treat as zero | c3-Y1-M1-Y3<br>by MCPB.py | 3 | 0.00 | 0.00  | 3.0  | Treat as zero         |
| Y1-M1-Y4-hn<br>by MCPB.py | 3 | 0.00 | 0.00 | 3.0 | Treat as zero | c3-Y2-M1-Y4<br>by MCPB.py | 3 | 0.00 | 0.00  | 3.0  | Treat as zero         |
| Y2-M1-Y1-cd<br>by MCPB.py | 3 | 0.00 | 0.00 | 3.0 | Treat as zero | c3-Y3-M1-Y2<br>by MCPB.py | 3 | 0.00 | 0.00  | 3.0  | Treat as zero         |
| Y2-M1-Y3-hn<br>by MCPB.py | 3 | 0.00 | 0.00 | 3.0 | Treat as zero | c3-Y3-M1-Y4<br>by MCPB.py | 3 | 0.00 | 0.00  | 3.0  | Treat as zero         |
| Y2-M1-Y4-c3<br>by MCPB.py | 3 | 0.00 | 0.00 | 3.0 | Treat as zero | c3-c3-Y2-M1<br>by MCPB.py | 3 | 0.00 | 0.00  | 3.0  | Treat as zero         |
| Y2-M1-Y4-hn<br>by MCPB.py | 3 | 0.00 | 0.00 | 3.0 | Treat as zero | c3-c3-Y3-M1<br>by MCPB.py | 3 | 0.00 | 0.00  | 3.0  | Treat as zero         |
| Y3-M1-Y1-cd<br>by MCPB.py | 3 | 0.00 | 0.00 | 3.0 | Treat as zero | c3-c3-Y4-M1<br>by MCPB.py | 3 | 0.00 | 0.00  | 3.0  | Treat as zero         |
| Y3-M1-Y2-hn<br>by MCPB.py | 3 | 0.00 | 0.00 | 3.0 | Treat as zero | c3-c3-Y1-M1<br>by MCPB.py | 3 | 0.00 | 0.00  | 3.0  | Treat as zero         |
| Y3-M1-Y4-c3<br>by MCPB.py | 3 | 0.00 | 0.00 | 3.0 | Treat as zero | c3-c3-Y4-c3               | 1 | 0.3  | 0.0   | -3.0 | Junmei et al,<br>1999 |
| Y3-M1-Y4-hn<br>by MCPB.py | 3 | 0.00 | 0.00 | 3.0 | Treat as zero | c3-c3-Y4-c3               | 1 | 0.48 | 180.0 | 2.0  | Junmei et<br>al, 1999 |
| Y4-M1-Y1-cd<br>by MCPB.py | 3 | 0.00 | 0.00 | 3.0 | Treat as zero | c3-c3-Y1-cc               | 1 | 0.48 | 180.0 | 2.0  | Junmei et<br>al, 1999 |
| Y4-M1-Y2-hn<br>by MCPB.py | 3 | 0.00 | 0.00 | 3.0 | Treat as zero | cc-Y1-M1-Y2<br>by MCPB.py | 3 | 0.00 | 0.00  | 3.0  | Treat as zero         |
| Y4-M1-Y3-hn<br>by MCPB.py | 3 | 0.00 | 0.00 | 3.0 | Treat as zero | cc-Y1-M1-Y3<br>by MCPB.py | 3 | 0.00 | 0.00  | 3.0  | Treat as zero         |
| c3-Y2-M1-Y3<br>by MCPB.py | 3 | 0.00 | 0.00 | 3.0 | Treat as zero | cc-Y1-M1-Y4<br>by MCPB.py | 3 | 0.00 | 0.00  | 3.0  | Treat as zero         |
| c3-na-M1-Y3<br>by MCPB.py | 3 | 0.00 | 0.00 | 3.0 | Treat as zero | h1-c3-Y2-M1<br>by MCPB.py | 3 | 0.00 | 0.00  | 3.0  | Treat as zero         |

|               |     |       |      |       |               |                                                 |        |        |     |         |
|---------------|-----|-------|------|-------|---------------|-------------------------------------------------|--------|--------|-----|---------|
| h1-c3-Y3-M1   | 3   | 0.00  | 0.00 | 3.0   | Treat as zero | cd-n -c -o                                      | 10.5   | 180.0  | 2.0 | General |
| by MCPB.py    |     |       |      |       |               | improper torsional angle (2 general atom types) |        |        |     |         |
| h1-c3-Y4-M1   | 3   | 0.00  | 0.00 | 3.0   | Treat as zero | c -cd-n -hn                                     | 1.1    | 180.0  | 2.0 | General |
| by MCPB.py    |     |       |      |       |               | improper torsional angle (2 general atom types) |        |        |     |         |
| h2-c3-Y1-M1   | 3   | 0.00  | 0.00 | 3.0   | Treat as zero | n -nc-cd-nh                                     | 1.1    | 180.0  | 2.0 | Using   |
| by MCPB.py    |     |       |      |       |               | default value                                   |        |        |     |         |
| h5-cc-Y1-M1   | 3   | 0.00  | 0.00 | 3.0   | Treat as zero | cd-hn-nh-hn                                     | 1.1    | 180.0  | 2.0 | Using   |
| by MCPB.py    |     |       |      |       |               | default value                                   |        |        |     |         |
| na-cc-Y1-M1   | 3   | 0.00  | 0.00 | 3.0   | Treat as zero | cd-na-cc-nc                                     | 1.1    | 180.0  | 2.0 | Using   |
| by MCPB.py    |     |       |      |       |               | default value                                   |        |        |     |         |
| na-cc-cd-Y1   | 3   | 0.00  | 0.00 | 3.0   |               | Y1-h5-cc-na                                     | 1.1    | 180.0  | 2.0 | Using   |
| Y1-cc-na-cc   | 3   | 0.00  | 0.00 | 3.0   |               | default value                                   |        |        |     |         |
| Y1-cd-c-o     | 3   | 0.00  | 0.00 | 3.0   |               | Y1-c -cd-cc                                     | 1.1    | 180.0  | 2.0 | Using   |
| Y1-cd-c-n     | 3   | 0.00  | 0.00 | 3.0   |               | default value                                   |        |        |     |         |
| Y1-cd-cc-nc   | 3   | 0.00  | 0.00 | 3.0   |               |                                                 |        |        |     |         |
| Y2-c3-c3-Y4   | 3   | 0.00  | 0.00 | 3.0   |               | NONBON                                          |        |        |     |         |
| Y2-c3-c3-h1   | 3   | 0.00  | 0.00 | 3.0   |               | p5                                              | 2.0732 | 0.2295 |     |         |
| Y2-c3-c3-h1   | 3   | 0.00  | 0.00 | 3.0   |               | o                                               | 1.7107 | 0.1463 |     |         |
| Y2-c3-c3-h1   | 3   | 0.00  | 0.00 | 3.0   |               | os                                              | 1.7713 | 0.0726 |     |         |
| Y3-c3-c3-Y4   | 3   | 0.00  | 0.00 | 3.0   |               | c3                                              | 1.9069 | 0.1078 |     |         |
| Y3-c3-c3-h1   | 3   | 0.00  | 0.00 | 3.0   |               | oh                                              | 1.8200 | 0.0930 |     |         |
| Y3-c3-c3-h1   | 3   | 0.00  | 0.00 | 3.0   |               | na                                              | 1.7992 | 0.2042 |     |         |
| Y4-c3-c3-h1   | 3   | 0.00  | 0.00 | 3.0   |               | cc                                              | 1.8606 | 0.0988 |     |         |
| Y4-c3-c3-h1   | 3   | 0.00  | 0.00 | 3.0   |               | cd                                              | 1.8606 | 0.0988 |     |         |
| Y4-c3-c3-h1   | 3   | 0.00  | 0.00 | 3.0   |               | c                                               | 1.8606 | 0.0988 |     |         |
| Y4-c3-c3-h1   | 3   | 0.00  | 0.00 | 3.0   |               | n                                               | 1.7852 | 0.1636 |     |         |
| c3-na-cc-Y1   | 3   | 0.00  | 0.00 | 3.0   |               | nh                                              | 1.7903 | 0.2150 |     |         |
|               |     |       |      |       |               | nc                                              | 1.8993 | 0.0941 |     |         |
| IMPROPER      |     |       |      |       |               | h1                                              | 1.3593 | 0.0208 |     |         |
| c3-cc-na-cc   | 1.1 | 180.0 | 2.0  | Using |               | hc                                              | 1.4593 | 0.0208 |     |         |
| default value |     |       |      |       |               |                                                 |        |        |     |         |

|    |        |              |                                                                          |
|----|--------|--------------|--------------------------------------------------------------------------|
| h2 | 1.2593 | 0.0208       |                                                                          |
| h5 | 1.3735 | 0.0161       |                                                                          |
| hn | 0.6210 | 0.0100       |                                                                          |
| ho | 0.3019 | 0.0047       |                                                                          |
| M1 | 1.2660 | 0.0030764200 | CM set for Pt2+<br>ion in TIP3P water from Li et al. JCTC, 2013, 9, 2733 |
| Y1 | 1.8240 | 0.1700       | OPLS                                                                     |
| Y2 | 1.8240 | 0.1700       | OPLS                                                                     |
| Y3 | 1.8240 | 0.1700       | OPLS                                                                     |
| Y4 | 1.8240 | 0.1700       | OPLS                                                                     |

## Parameters complex 2

### File off:

!!index array str

"MOL"

!entry.MOL.unit.atoms table str name str type int typex  
int resx int flags int seq int elmnt dbl chg

"P1" "p5" 0 1 131072 1 15 1.125285

"O1" "o" 0 1 131072 2 8 -0.754291

"O2" "oh" 0 1 131072 3 8 -0.604601

"O3" "o" 0 1 131072 4 8 -0.754291

"O4" "os" 0 1 131072 5 8 -0.418199

"P2" "p5" 0 1 131072 6 15 1.098280

"O5" "o" 0 1 131072 7 8 -0.716928

"O6" "o" 0 1 131072 8 8 -0.716928

"O7" "os" 0 1 131072 9 8 -0.469240

"P3" "p5" 0 1 131072 10 15 1.333113

"O8" "oh" 0 1 131072 11 8 -0.813652

"O9" "o" 0 1 131072 12 8 -0.743769

"O10" "os" 0 1 131072 13 8 -0.393679

"C1" "c3" 0 1 131072 14 6 -0.177885

"C2" "c3" 0 1 131072 15 6 0.367282

"O11" "os" 0 1 131072 16 8 -0.527228

"C3" "c3" 0 1 131072 17 6 0.531252

"O12" "oh" 0 1 131072 18 8 -0.773339

"C4" "c3" 0 1 131072 19 6 -0.304723

"C5" "c3" 0 1 131072 20 6 0.244592

"N1" "na" 0 1 131072 21 7 -0.241174

"C6" "c2" 0 1 131072 22 6 0.328615

"N2" "Y1" 0 1 131072 23 7 -0.363914

"C7" "c2" 0 1 131072 24 6 -0.322051

"C8" "c2" 0 1 131072 25 6 0.877511

"O13" "o" 0 1 131072 26 8 -0.665214

"N3" "ns" 0 1 131072 27 7 -0.828823

"C9" "c2" 0 1 131072 28 6 0.997780

"N4" "nv" 0 1 131072 29 7 -0.993401

"N5" "n2" 0 1 131072 30 7 -0.797741

"C10" "c2" 0 1 131072 31 6 0.581560

"N6" "Y2" 0 1 131072 32 7 -0.944276

"N7" "Y3" 0 1 131072 33 7 -1.215885

"H1" "h1" 0 1 131072 34 1 0.107442

"H2" "h1" 0 1 131072 35 1 0.107442

"H3" "h1" 0 1 131072 36 1 -0.013563

"H4" "h1" 0 1 131072 37 1 -0.057286

"H5" "hc" 0 1 131072 38 1 0.095972

"H6" "hc" 0 1 131072 39 1 0.095972

"H7" "h2" 0 1 131072 40 1 0.092949

|                                                 |                     |
|-------------------------------------------------|---------------------|
| "H8" "h5" 0 1 131072 41 1 0.192431              | "O9" "o" 0 -1 0.0   |
| "H9" "hn" 0 1 131072 42 1 0.417336              | "O10" "os" 0 -1 0.0 |
| "H10" "ho" 0 1 131072 43 1 0.342319             | "C1" "c3" 0 -1 0.0  |
| "H11" "hn" 0 1 131072 44 1 0.399656             | "C2" "c3" 0 -1 0.0  |
| "H12" "hn" 0 1 131072 45 1 0.399656             | "O11" "os" 0 -1 0.0 |
| "H13" "hn" 0 1 131072 46 1 0.392561             | "C3" "c3" 0 -1 0.0  |
| "H14" "hn" 0 1 131072 47 1 0.392561             | "O12" "oh" 0 -1 0.0 |
| "H15" "ho" 0 1 131072 48 1 0.436381             | "C4" "c3" 0 -1 0.0  |
| "PT" "M1" 0 1 131072 49 -1 0.531600             | "C5" "c3" 0 -1 0.0  |
| "H16" "hn" 0 1 131072 50 1 0.392561             | "N1" "na" 0 -1 0.0  |
| "H17" "hn" 0 1 131072 51 1 0.363593             | "C6" "c2" 0 -1 0.0  |
| "H18" "hn" 0 1 131072 52 1 0.363593             | "N2" "Y2" 0 -1 0.0  |
| "O14" "Y4" 0 1 131072 53 8 -1.039336            | "C7" "c2" 0 -1 0.0  |
| "H19" "ho" 0 1 131072 54 1 0.472268             | "C8" "c2" 0 -1 0.0  |
| "H20" "ho" 0 1 131072 55 1 0.569852             | "O13" "o" 0 -1 0.0  |
| !entry.MOL.unit.atomsptinfo table str pname str | "N3" "ns" 0 -1 0.0  |
| pctype int ptypex int pelmnt dbl pchg           | "C9" "c2" 0 -1 0.0  |
| "P1" "p5" 0 -1 0.0                              | "N4" "nv" 0 -1 0.0  |
| "O1" "o" 0 -1 0.0                               | "N5" "n2" 0 -1 0.0  |
| "O2" "oh" 0 -1 0.0                              | "C10" "c2" 0 -1 0.0 |
| "O3" "o" 0 -1 0.0                               | "N6" "Y2" 0 -1 0.0  |
| "O4" "os" 0 -1 0.0                              | "N7" "Y3" 0 -1 0.0  |
| "P2" "p5" 0 -1 0.0                              | "H1" "h1" 0 -1 0.0  |
| "O5" "o" 0 -1 0.0                               | "H2" "h1" 0 -1 0.0  |
| "O6" "o" 0 -1 0.0                               | "H3" "h1" 0 -1 0.0  |
| "O7" "os" 0 -1 0.0                              | "H4" "h1" 0 -1 0.0  |
| "P3" "p5" 0 -1 0.0                              | "H5" "hc" 0 -1 0.0  |
| "O8" "oh" 0 -1 0.0                              | "H6" "hc" 0 -1 0.0  |

|                                          |                                                   |
|------------------------------------------|---------------------------------------------------|
| "H7" "h2" 0 -1 0.0                       | !entry.MOL.unit.connectivity table int atom1x int |
| "H8" "h5" 0 -1 0.0                       | atom2x int flags                                  |
| "H9" "hn" 0 -1 0.0                       | 1 2 1                                             |
| "H10" "ho" 0 -1 0.0                      | 1 3 1                                             |
| "H11" "hn" 0 -1 0.0                      | 1 4 1                                             |
| "H12" "hn" 0 -1 0.0                      | 1 5 1                                             |
| "H13" "hn" 0 -1 0.0                      | 5 6 1                                             |
| "H14" "hn" 0 -1 0.0                      | 6 7 1                                             |
| "H15" "ho" 0 -1 0.0                      | 6 8 1                                             |
| "PT" "M1" 0 -1 0.0                       | 6 9 1                                             |
| "H16" "hn" 0 -1 0.0                      | 9 10 1                                            |
| "H17" "hn" 0 -1 0.0                      | 10 11 1                                           |
| "H18" "hn" 0 -1 0.0                      | 10 12 1                                           |
| "O14" "Y4" 0 -1 0.0                      | 10 13 1                                           |
| "H19" "ho" 0 -1 0.0                      | 13 14 1                                           |
| "H20" "ho" 0 -1 0.0                      | 14 15 1                                           |
| !entry.MOL.unit.boundbox array dbl       | 14 34 1                                           |
| -1.000000                                | 14 35 1                                           |
| 0.0                                      | 15 16 1                                           |
| 0.0                                      | 15 17 1                                           |
| 0.0                                      | 15 36 1                                           |
| 0.0                                      | 16 20 1                                           |
| !entry.MOL.unit.childsequence single int | 17 18 1                                           |
| 2                                        | 17 19 1                                           |
| !entry.MOL.unit.connect array int        | 17 37 1                                           |
| 0                                        | 18 48 1                                           |
| 0                                        | 19 20 1                                           |
|                                          | 19 38 1                                           |



|         |                                                   |
|---------|---------------------------------------------------|
| 19 39 1 | 49 53 1                                           |
| 20 21 1 | 53 54 1                                           |
| 20 40 1 | 53 55 1                                           |
| 21 22 1 | !entry.MOL.unit.hierarchy table str abovetype int |
| 21 31 1 | abovex str belowtype int belowx                   |
| 22 23 1 | "U" 0 "R" 1                                       |
| 22 41 1 | "R" 1 "A" 1                                       |
| 23 24 1 | "R" 1 "A" 2                                       |
| 23 49 1 | "R" 1 "A" 3                                       |
| 24 25 1 | "R" 1 "A" 4                                       |
| 24 31 1 | "R" 1 "A" 5                                       |
| 25 26 1 | "R" 1 "A" 6                                       |
| 25 27 1 | "R" 1 "A" 7                                       |
| 27 28 1 | "R" 1 "A" 8                                       |
| 27 42 1 | "R" 1 "A" 9                                       |
| 28 29 1 | "R" 1 "A" 10                                      |
| 28 30 1 | "R" 1 "A" 11                                      |
| 29 44 1 | "R" 1 "A" 12                                      |
| 29 45 1 | "R" 1 "A" 13                                      |
| 30 31 1 | "R" 1 "A" 14                                      |
| 32 46 1 | "R" 1 "A" 15                                      |
| 32 47 1 | "R" 1 "A" 16                                      |
| 32 50 1 | "R" 1 "A" 17                                      |
| 32 49 1 | "R" 1 "A" 18                                      |
| 33 51 1 | "R" 1 "A" 19                                      |
| 33 52 1 | "R" 1 "A" 20                                      |
| 33 43 1 | "R" 1 "A" 21                                      |
| 33 49 1 | "R" 1 "A" 22                                      |

|              |                                                   |
|--------------|---------------------------------------------------|
| "R" 1 "A" 23 | "R" 1 "A" 51                                      |
| "R" 1 "A" 24 | "R" 1 "A" 52                                      |
| "R" 1 "A" 25 | "R" 1 "A" 53                                      |
| "R" 1 "A" 26 | "R" 1 "A" 54                                      |
| "R" 1 "A" 27 | "R" 1 "A" 55                                      |
| "R" 1 "A" 28 | !entry.MOL.unit.name single str                   |
| "R" 1 "A" 29 | "MOL"                                             |
| "R" 1 "A" 30 | !entry.MOL.unit.positions table dbl x dbl y dbl z |
| "R" 1 "A" 31 | 0.636000 -0.359000 2.908000                       |
| "R" 1 "A" 32 | -0.713000 -0.039000 2.264000                      |
| "R" 1 "A" 33 | 1.141000 -1.828000 2.340000                       |
| "R" 1 "A" 34 | 0.783000 -0.328000 4.394000                       |
| "R" 1 "A" 35 | 1.714000 0.674000 2.140000                        |
| "R" 1 "A" 36 | 3.256000 0.511000 1.609000                        |
| "R" 1 "A" 37 | 3.611000 1.842000 0.971000                        |
| "R" 1 "A" 38 | 4.165000 -0.191000 2.552000                       |
| "R" 1 "A" 39 | 2.913000 -0.581000 0.313000                       |
| "R" 1 "A" 40 | 3.154000 -0.406000 -1.269000                      |
| "R" 1 "A" 41 | 2.505000 -1.690000 -1.894000                      |
| "R" 1 "A" 42 | 4.540000 -0.100000 -1.705000                      |
| "R" 1 "A" 43 | 2.090000 0.784000 -1.710000                       |
| "R" 1 "A" 44 | 2.580000 2.085000 -2.029000                       |
| "R" 1 "A" 45 | 1.574000 3.147000 -1.630000                       |
| "R" 1 "A" 46 | 0.317000 2.995000 -2.364000                       |
| "R" 1 "A" 47 | 1.182000 3.197000 -0.140000                       |
| "R" 1 "A" 48 | 2.091000 3.923000 0.634000                        |
| "R" 1 "A" 49 | -0.199000 3.857000 -0.225000                      |
| "R" 1 "A" 50 | -0.766000 3.239000 -1.506000                      |

|                               |                                                      |
|-------------------------------|------------------------------------------------------|
| -1.459000 1.949000 -1.224000  | -0.909000 -2.200000 -0.671000                        |
| -0.957000 0.693000 -1.440000  | -2.772000 -2.296000 1.167000                         |
| -1.747000 -0.246000 -0.949000 | 0.410000 -3.927000 0.567000                          |
| -2.819000 0.420000 -0.384000  | 0.783000 -4.012000 -0.974000                         |
| -3.998000 -0.044000 0.287000  | 0.112000 -1.963000 -2.462000                         |
| -4.421000 -1.172000 0.527000  | 0.080000 -2.824000 -2.899000                         |
| -4.785000 1.072000 0.715000   | 1.456000 -1.750000 -2.108000                         |
| -4.486000 2.395000 0.534000   | !entry.MOL.unit.residueconnect table int c1x int c2x |
| -5.409000 3.314000 1.038000   | int c3x int c4x int c5x int c6x                      |
| -3.432000 2.813000 -0.110000  | 0 0 0 0 0 0                                          |
| -2.638000 1.796000 -0.549000  | !entry.MOL.unit.residues table str name int seq int  |
| -1.753000 -2.311000 1.216000  | childseq int startatomx str restype int imagingx     |
| -0.033000 -4.003000 -0.355000 | "MOL" 1 56 1 "?" 0                                   |
| 2.778000 2.141000 -3.109000   | !entry.MOL.unit.residuesPdbSequenceNumber array int  |
| 3.508000 2.288000 -1.487000   | 0                                                    |
| 2.003000 4.126000 -1.897000   | !entry.MOL.unit.solventcap array dbl                 |
| 1.073000 2.175000 0.241000    | -1.000000                                            |
| -0.076000 4.938000 -0.367000  | 0.0                                                  |
| -0.827000 3.682000 0.650000   | 0.0                                                  |
| -1.506000 3.871000 -2.012000  | 0.0                                                  |
| -0.004000 0.519000 -1.914000  | 0.0                                                  |
| -5.644000 0.802000 1.176000   | !entry.MOL.unit.velocities table dbl x dbl y dbl z   |
| 1.464000 -1.735000 1.427000   | 0.0 0.0 0.0                                          |
| -5.010000 4.245000 0.991000   | 0.0 0.0 0.0                                          |
| -5.711000 3.103000 1.983000   | 0.0 0.0 0.0                                          |
| -1.442000 -3.150000 1.699000  | 0.0 0.0 0.0                                          |
| -1.392000 -1.458000 1.735000  | 0.0 0.0 0.0                                          |
| 2.743000 3.224000 0.931000    | 0.0 0.0 0.0                                          |

[illegible]

0.0 0.0 0.0  
0.0 0.0 0.0  
0.0 0.0 0.0  
0.0 0.0 0.0  
0.0 0.0 0.0  
0.0 0.0 0.0  
0.0 0.0 0.0  
0.0 0.0 0.0  
0.0 0.0 0.0  
0.0 0.0 0.0  
0.0 0.0 0.0  
0.0 0.0 0.0  
0.0 0.0 0.0  
0.0 0.0 0.0  
0.0 0.0 0.0  
0.0 0.0 0.0  
0.0 0.0 0.0  
0.0 0.0 0.0  
0.0 0.0 0.0  
**File frcmoc**  
remark gY4  
MASS  
p5 30.970  
oh 16.000  
os 16.000  
c3 12.010  
na 14.010

|              |       |         |               |        |                                             |
|--------------|-------|---------|---------------|--------|---------------------------------------------|
| c2 12.010    | 0.360 |         | c3-h2 377.33  | 1.096  |                                             |
| n2 14.010    | 0.530 |         | na-c2 327.66  | 1.401  |                                             |
| ns 14.010    | 0.530 |         | c2-n2 518.67  | 1.282  |                                             |
| nv 14.010    | 0.530 |         | c2-h5 386.13  | 1.091  |                                             |
| n9 14.010    | 0.530 |         | c2-c2 481.83  | 1.334  |                                             |
| h1 1.008     | 0.135 |         | c2-Y4 635.23  | 1.225  |                                             |
| hc 1.008     | 0.135 |         | c2-ns 330.19  | 1.399  | same as c2-n                                |
| h2 1.008     | 0.135 |         | ns-hn 527.31  | 1.013  | same as hn-n                                |
| h5 1.008     | 0.135 |         | c2-nv 345.39  | 1.387  | same as c2-nh                               |
| hn 1.008     | 0.161 |         | nv-hn 529.46  | 1.012  | same as hn-nh                               |
| ho 1.008     | 0.135 |         | n9-hn 511.28  | 1.019  | same as hn-n3                               |
| M1 195.08    |       | Pt iY4n | n2-hn 501.09  | 1.023  |                                             |
| Y1 14.010    | 0.530 |         | Y4 -ho 540.28 | 0.981  |                                             |
| Y2 14.010    | 0.530 |         | Y1-M1 80.3    | 2.1471 | Created by Seminar iY4 method using MCPB.py |
| Y3 14.010    | 0.530 |         | Y2-M1 80.3    | 2.1471 | Created by Seminar iY4 method using MCPB.py |
| Y4 16.000    | 0.434 |         | Y3-M1 80.0    | 2.1471 | Created by Seminar iY4 method using MCPB.py |
| BOND         |       |         | Y4-M1 78.6    | 2.3471 | Created by Seminar iY4 method using MCPB.py |
| p5-Y4 529.55 | 1.487 |         | Y4 -M1 78.6   | 2.6178 | Created by Seminario method using MCPB.py   |
| p5-oh 346.03 | 1.615 |         | Y2-hn 511.28  | 1.019  | same as hn-n3                               |
| p5-os 346.25 | 1.615 |         | Y3-hn 501.09  | 1.023  |                                             |
| oh-ho 563.51 | 0.973 |         | Y3-ho 501.09  | 1.023  |                                             |
| os-c3 284.76 | 1.432 |         | Y4-ho 540.28  | 0.981  |                                             |
| c3-c3 232.52 | 1.538 |         | c2-Y1 518.67  | 1.282  |                                             |
| c3-h1 375.92 | 1.097 |         | oh-M1 81.6    | 2.6178 |                                             |
| c3-oh 293.40 | 1.423 |         |               |        |                                             |
| c3-hc 375.92 | 1.097 |         |               |        |                                             |
| c3-na 262.85 | 1.463 |         |               |        |                                             |

|           |         |         |           |         |         |                                            |
|-----------|---------|---------|-----------|---------|---------|--------------------------------------------|
| ANGLE     |         |         | na-c2-h5  | 59.208  | 126.390 |                                            |
| p5-oh-ho  | 58.997  | 110.080 | na-c2-c2  | 87.232  | 121.940 |                                            |
| p5-oh-M1  | 58.997  | 110.080 | c2-na-c2  | 69.273  | 110.370 |                                            |
| p5-Y4 -M1 | 58.997  | 110.080 | c2-n2-c2  | 73.202  | 118.180 |                                            |
| p5-os-p5  | 106.787 | 126.250 | n2-c2-h5  | 64.543  | 121.700 |                                            |
| Y4 -p5-oh | 81.901  | 115.210 | n2-c2-c2  | 89.778  | 126.010 |                                            |
| Y4 -p5-o  | 85.510  | 115.800 | c2-c2-Y4  | 89.793  | 130.890 |                                            |
| Y4 -p5-os | 81.819  | 115.460 | c2-c2-ns  | 86.693  | 123.670 | same as c2-c2-n                            |
| oh-p5-os  | 83.902  | 101.940 | c2-c2-c2  | 71.539  | 121.810 |                                            |
| os-p5-os  | 83.949  | 101.840 | c2-ns-c2  | 67.455  | 116.750 | same as c2-n -c2                           |
| p5-os-c3  | 83.251  | 119.540 | c2-ns-hn  | 47.988  | 117.900 | same as c2-n -hn                           |
| os-c3-c3  | 85.306  | 107.970 | Y4 -c2-ns | 75.107  | 117.460 | Calculated with empirical approach         |
| os-c3-h1  | 62.377  | 109.780 | ns-c2-nv  | 113.384 | 109.350 | same as n -c2-nh                           |
| c3-c3-c3  | 64.888  | 111.510 | ns-c2-n2  | 110.772 | 122.820 | same as n -c2-n2                           |
| c3-c3-h1  | 46.868  | 109.560 | c2-nv-hn  | 48.954  | 115.090 | same as c2-nh-hn                           |
| c3-os-c3  | 66.293  | 112.480 | nv-c2-n2  | 110.708 | 124.270 | same as n2-c2-nh                           |
| c3-c3-oh  | 84.642  | 110.190 | h1-c3-h1  | 38.802  | 108.460 |                                            |
| os-c3-na  | 109.296 | 109.030 | hc-c3-hc  | 38.960  | 107.580 |                                            |
| o -c2-ns  | 109.296 | 109.030 | hn-nv-hn  | 39.519  | 115.120 | same as hn-nh-hn                           |
| os-c3-h2  | 62.442  | 109.580 | hn-n9-hn  | 40.828  | 106.400 | same as hn-n3-hn                           |
| c3-oh-ho  | 49.027  | 107.260 | hn-n2-hn  | 38.294  | 120.000 |                                            |
| c3-c3-hc  | 46.816  | 109.800 | M1-Y2-hn  | 67.55   | 104.19  | Created by SeminariY4 method using MCPB.py |
| oh-c3-h1  | 62.540  | 110.260 | M1-Y3-hn  | 67.39   | 104.19  | Created by SeminariY4 method using MCPB.py |
| c3-c3-na  | 82.668  | 112.880 | M1-Y3-ho  | 67.39   | 104.19  |                                            |
| c3-c3-h2  | 46.730  | 110.220 | M1-Y4-ho  | 50.01   | 91.15   | Created by Seminario method using MCPB.py  |
| c3-na-c2  | 65.723  | 117.200 |           |         |         |                                            |
| na-c3-h2  | 61.963  | 107.310 |           |         |         |                                            |
| na-c2-n2  | 110.312 | 123.620 |           |         |         |                                            |

Y1-M1-Y2 182.00 90.94 Created by SeminariY4  
method using MCPB.py

Y1-M1-Y3 182.48 180.46 Created by SeminariY4  
method using MCPB.py

Y1-M1-Y4 182.50 89.61 Created by SeminariY4  
method using MCPB.py

Y2-M1-Y3 182.00 87.62 Created by SeminariY4  
method using MCPB.py

Y2-M1-Y4 182.43 183.80 Created by SeminariY4  
method using MCPB.py

Y3-M1-Y4 182.71 96.43 Created by SeminariY4  
method using MCPB.py

oh-M1-Y2 180.43 83.80 Created by Seminario  
method using MCPB.py

oh-M1-Y3 182.43 83.80 Created by Seminario  
method using MCPB.py

oh-M1-Y1 182.43 93.80 Created by Seminario  
method using MCPB.py

oh-M1-Y4 182.71 86.43 Created by Seminario  
method using MCPB.py

ho -oh-M1 72.71 86.43 Created by Seminario  
method using MCPB.py

Y4 -M1-oh 72.71 76.43 Created by Seminario  
method using MCPB.py

c2-Y1-M1 11.11 120.68 Created by SeminariY4  
method using MCPB.py

Y1-c2-c2 89.778 126.010

c2-Y1-c2 73.202 118.180

h5-c2-Y1 52.26 121.70 SOURCE4\_SOURCE5  
71 2.1538

hn-Y2-hn 40.828 106.400 same as hn-n3-hn

hn-Y3-hn 38.294 120.000

ho-Y3-hn 38.294 120.000

na-c2-Y1 110.312 123.620

ho-Y4-ho 38.294 120.000

DIHE

p5-os-p5-o 1 0.800 0.000 2.000

p5-os-p5-os 1 0.800 0.000 2.000

Y4 -p5-oh-ho 1 0.367 0.000 3.000

oh-p5-os-p5 1 0.800 0.000 2.000

os-p5-oh-ho 1 0.533 0.000 3.000

os-p5-os-c3 1 0.000 0.000 -3.000

os-p5-os-c3 1 2.610 0.000 2.000

p5-os-c3-c3 1 0.383 0.000 -3.000

p5-os-c3-c3 1 3.950 180.000 1.000

p5-os-c3-h1 1 0.217 0.000 3.000

oh-p5-os-c3 1 0.250 0.000 -3.000

oh-p5-os-c3 1 1.200 0.000 2.000

Y4 -p5-os-c3 1 0.800 0.000 -2.000

Y4 -p5-os-c3 1 0.550 0.000 3.000

os-c3-c3-os 1 0.000 0.000 -3.000

os-c3-c3-os 1 0.000 180.000 -2.000

os-c3-c3-os 1 0.170 180.000 1.000

os-c3-c3-c3 1 0.156 0.000 3.000

os-c3-c3-h1 1 0.000 0.000 -3.000

os-c3-c3-h1 1 0.250 0.000 1.000

c3-c3-os-c3 1 0.240 0.000 -3.000

c3-c3-os-c3 1 0.160 0.000 2.000

c3-c3-c3-oh 1 0.210 0.000 3.000

c3-c3-c3-c3 1 0.130 0.000 -3.000

|             |   |       |         |        |              |   |       |         |       |                       |
|-------------|---|-------|---------|--------|--------------|---|-------|---------|-------|-----------------------|
| c3-c3-c3-c3 | 1 | 0.290 | 180.000 | -2.000 | na-c2-c2-n2  | 1 | 6.650 | 180.000 | 2.000 |                       |
| c3-c3-c3-c3 | 1 | 0.110 | 0.000   | 1.000  | na-c2-c2-c2  | 1 | 6.650 | 180.000 | 2.000 |                       |
| c3-c3-c3-h1 | 1 | 0.156 | 0.000   | 3.000  | c2-na-c3-h2  | 1 | 0.000 | 0.000   | 2.000 |                       |
| c3-os-c3-na | 1 | 0.383 | 0.000   | -3.000 | c2-na-c2-c2  | 1 | 0.625 | 180.000 | 2.000 |                       |
| c3-os-c3-na | 1 | 0.650 | 0.000   | 2.000  | c2-na-c2-n2  | 1 | 0.625 | 180.000 | 2.000 |                       |
| c3-os-c3-h2 | 1 | 0.383 | 0.000   | 3.000  | c2-n2-c2-c2  | 1 | 4.150 | 180.000 | 2.000 |                       |
| c3-c3-oh-ho | 1 | 0.000 | 0.000   | 3.000  | n2-c2-c2-Y4  | 1 | 6.650 | 180.000 | 2.000 |                       |
| c3-c3-c3-hc | 1 | 0.080 | 0.000   | 3.000  | n2-c2-c2-ns  | 1 | 6.650 | 180.000 | 2.000 |                       |
| os-c3-c3-oh | 1 | 1.010 | 0.000   | -3.000 | n2-c2-c2-n2  | 1 | 6.650 | 180.000 | 2.000 |                       |
| os-c3-c3-oh | 1 | 0.000 | 0.000   | -2.000 | c2-n2-c2-h5  | 1 | 4.150 | 180.000 | 2.000 |                       |
| os-c3-c3-oh | 1 | 0.020 | 180.000 | 1.000  | c2-c2-ns-c2  | 1 | 0.650 | 180.000 | 2.000 | same<br>as X -c2-n -X |
| os-c3-c3-hc | 1 | 0.000 | 0.000   | -3.000 | c2-c2-ns-hn  | 1 | 0.650 | 180.000 | 2.000 | same<br>as X -c2-n -X |
| os-c3-c3-hc | 1 | 0.250 | 0.000   | 1.000  | c2-c2-c2-n2  | 1 | 6.650 | 180.000 | 2.000 |                       |
| os-c3-na-c2 | 1 | 0.000 | 0.000   | -2.000 | c2-ns-c2-nv  | 1 | 0.650 | 180.000 | 2.000 | same<br>as X -c2-n -X |
| os-c3-na-c2 | 1 | 2.500 | 0.000   | 1.000  | c2-ns-c2-n2  | 1 | 0.650 | 180.000 | 2.000 | same<br>as X -c2-n -X |
| c3-c3-c3-na | 1 | 0.156 | 0.000   | 3.000  | Y4 -c2-c2-c2 | 1 | 6.650 | 180.000 | 2.000 |                       |
| c3-c3-c3-h2 | 1 | 0.156 | 0.000   | 3.000  | Y4 -c2-ns-c2 | 1 | 0.650 | 180.000 | 2.000 | same<br>as X -c2-n -X |
| oh-c3-c3-h1 | 1 | 0.000 | 0.000   | -3.000 | Y4 -c2-ns-hn | 1 | 0.650 | 180.000 | 2.000 | same<br>as X -c2-n -X |
| oh-c3-c3-h1 | 1 | 0.250 | 0.000   | 1.000  | ns-c2-c2-c2  | 1 | 6.650 | 180.000 | 2.000 |                       |
| oh-c3-c3-hc | 1 | 0.180 | 0.000   | -3.000 | ns-c2-nv-hn  | 1 | 0.675 | 180.000 | 2.000 | same<br>as X -c2-nh-X |
| oh-c3-c3-h  | 1 | 0.510 | 0.000   | 1.000  | ns-c2-n2-c2  | 1 | 4.150 | 180.000 | 2.000 |                       |
| c3-c3-na-c2 | 1 | 0.000 | 0.000   | 2.000  | nv-c2-ns-hn  | 1 | 0.650 | 180.000 | 2.000 | same<br>as X -c2-n -X |
| c3-os-c3-h1 | 1 | 0.337 | 0.000   | 3.000  | nv-c2-n2-c2  | 1 | 4.150 | 180.000 | 2.000 |                       |
| c3-na-c2-n2 | 1 | 0.625 | 180.000 | 2.000  |              |   |       |         |       |                       |
| c3-na-c2-h5 | 1 | 0.625 | 180.000 | 2.000  |              |   |       |         |       |                       |
| c3-na-c2-c2 | 1 | 0.625 | 180.000 | 2.000  |              |   |       |         |       |                       |
| na-c3-c3-hc | 1 | 0.156 | 0.000   | 3.000  |              |   |       |         |       |                       |
| na-c2-n2-c2 | 1 | 4.150 | 180.000 | 2.000  |              |   |       |         |       |                       |



|                  |   |       |         |       |          |             |   |       |       |     |                           |
|------------------|---|-------|---------|-------|----------|-------------|---|-------|-------|-----|---------------------------|
| n2-c2-ns-hn      | 1 | 0.650 | 180.000 | 2.000 | same     | Y2-M1-Y4-ho | 3 | 0.00  | 0.00  | 3.0 | Treat as zero by MCPB.py  |
| as X -c2-n -X    |   |       |         |       |          |             |   |       |       |     |                           |
| n2-c2-nv-hn      | 1 | 0.675 | 180.000 | 2.000 | same     | Y3-M1-Y1-c2 | 3 | 0.00  | 0.00  | 3.0 | Treat as zerY4 by MCPB.py |
| as X -c2-nh-X    |   |       |         |       |          |             |   |       |       |     |                           |
| c2-na-c2-h5      | 1 | 0.625 | 180.000 | 2.000 |          | Y3-M1-Y2-hn | 3 | 0.00  | 0.00  | 3.0 | Treat as zerY4 by MCPB.py |
| h1-c3-c3-h1      | 1 | 0.156 | 0.000   | 3.000 |          | Y3-M1-Y4-ho | 3 | 0.00  | 0.00  | 3.0 | Treat as zero by MCPB.py  |
| h1-c3-oh-ho      | 1 | 0.113 | 0.000   | 3.000 |          | Y4-M1-Y1-c2 | 3 | 0.00  | 0.00  | 3.0 | Treat as zerY4 by MCPB.py |
| h1-c3-c3-hc      | 1 | 0.156 | 0.000   | 3.000 |          | Y4-M1-Y2-hn | 3 | 0.00  | 0.00  | 3.0 | Treat as zerY4 by MCPB.py |
| hc-c3-c3-h2      | 1 | 0.156 | 0.000   | 3.000 |          | Y4-M1-Y3-hn | 3 | 0.00  | 0.00  | 3.0 | Treat as zerY4 by MCPB.py |
| M1-Y1-c2-c2      | 3 | 0.00  | 0.00    | 3.0   | Treat as | c2-Y1-M1-Y2 | 3 | 0.00  | 0.00  | 3.0 | Treat as zerY4 by MCPB.py |
| zerY4 by MCPB.py |   |       |         |       |          | c2-Y1-M1-Y3 | 3 | 0.00  | 0.00  | 3.0 | Treat as zerY4 by MCPB.py |
| Y1-M1-Y2-hn      | 3 | 0.00  | 0.00    | 3.0   | Treat as | c2-Y1-M1-Y4 | 3 | 0.00  | 0.00  | 3.0 | Treat as zerY4 by MCPB.py |
| zerY4 by MCPB.py |   |       |         |       |          | c2-Y1-c2-c2 | 1 | 4.15  | 180.0 | 2.0 |                           |
| oh-M1-Y2-hn      | 3 | 0.00  | 0.00    | 3.0   | Treat as | c2-na-c2-Y1 | 1 | 0.625 | 180.0 | 2.0 |                           |
| zero by MCPB.py  |   |       |         |       |          | c3-na-c2-Y1 | 1 | 0.625 | 180.0 | 2.0 |                           |
| oh-M1-Y3-hn      | 3 | 0.00  | 0.00    | 3.0   | Treat as | h5-c2-Y1-M1 | 3 | 0.00  | 0.00  | 3.0 | Treat as zerY4 by MCPB.py |
| zero by MCPB.py  |   |       |         |       |          | h5-c2-Y1-c2 | 1 | 4.15  | 180.0 | 2.0 |                           |
| oh-M1-Y1-c2      | 3 | 0.00  | 0.00    | 3.0   | Treat as | na-c2-Y1-M1 | 3 | 0.00  | 0.00  | 3.0 | Treat as zerY4 by MCPB.py |
| zero by MCPB.py  |   |       |         |       |          | na-c2-Y1-c2 | 1 | 4.15  | 180.0 | 2.0 |                           |
| oh-M1-Y4-ho      | 3 | 0.00  | 0.00    | 3.0   | Treat as | na-c2-c2-Y1 | 1 | 6.65  | 180.0 | 2.0 |                           |
| zero by MCPB.py  |   |       |         |       |          | ho-Y3-M1-Y4 | 3 | 0.00  | 0.00  | 3.0 |                           |
| Y1-M1-Y3-hn      | 3 | 0.00  | 0.00    | 3.0   | Treat as | Y2-M1-Y3-ho | 3 | 0.00  | 0.00  | 3.0 |                           |
| zerY4 by MCPB.py |   |       |         |       |          |             |   |       |       |     |                           |
| Y1-M1-Y4-ho      | 3 | 0.00  | 0.00    | 3.0   | Treat as |             |   |       |       |     |                           |
| zero by MCPB.py  |   |       |         |       |          |             |   |       |       |     |                           |
| Y1-c2-c2-n2      | 1 | 6.65  | 180.0   | 2.0   |          |             |   |       |       |     |                           |
| Y1-c2-c2-ns      | 1 | 6.65  | 180.0   | 2.0   |          |             |   |       |       |     |                           |
| Y1-c2-c2-Y4      | 1 | 6.65  | 180.0   | 2.0   |          |             |   |       |       |     |                           |
| Y2-M1-Y1-c2      | 3 | 0.00  | 0.00    | 3.0   | Treat as |             |   |       |       |     |                           |
| zerY4 by MCPB.py |   |       |         |       |          |             |   |       |       |     |                           |
| Y2-M1-Y3-hn      | 3 | 0.00  | 0.00    | 3.0   | Treat as |             |   |       |       |     |                           |
| zerY4 by MCPB.py |   |       |         |       |          |             |   |       |       |     |                           |

|               |   |        |        |     |       |                                                         |        |              |                  |
|---------------|---|--------|--------|-----|-------|---------------------------------------------------------|--------|--------------|------------------|
| Y1-M1-Y3-ho   | 3 | 0.00   | 0.00   | 3.0 |       | na                                                      | 1.7992 | 0.2042       |                  |
| o -c2-ns-c2   | 3 | 0.00   | 0.00   | 3.0 |       | c2                                                      | 1.8606 | 0.0988       |                  |
| o -c2-ns-hn   | 3 | 0.00   | 0.00   | 3.0 |       | n2                                                      | 1.8993 | 0.0941       |                  |
|               |   |        |        |     |       | ns                                                      | 1.8352 | 0.1174       |                  |
| IMPROPER      |   |        |        |     |       | nv                                                      | 1.8903 | 0.1120       |                  |
| c2-c2-na-c3   |   | 1.1    | 180.0  | 2.0 |       | n9                                                      | 2.2700 | 0.0095       |                  |
| h5-n2-c2-na   |   | 1.1    | 180.0  | 2.0 | Using | h1                                                      | 1.3593 | 0.0208       |                  |
| default value |   |        |        |     |       | hc                                                      | 1.4593 | 0.0208       |                  |
| c2-c2-c2-n2   |   | 1.1    | 180.0  | 2.0 | Using | h2                                                      | 1.2593 | 0.0208       |                  |
| default value |   |        |        |     |       | h5                                                      | 1.3735 | 0.0161       |                  |
| c2-ns-c2-Y4   |   | 1.1    | 180.0  | 2.0 | Using | hn                                                      | 0.6210 | 0.0100       |                  |
| default value |   |        |        |     |       | ho                                                      | 0.3019 | 0.0047       |                  |
| c2-c2-ns-hn   |   | 1.1    | 180.0  | 2.0 | Using | M1                                                      | 1.2660 | 0.0030764200 | CM set fY4r Pt2+ |
| default value |   |        |        |     |       | ion in TIP3P water from Li et al. JCTC, 2013, 9, 2733   |        |              |                  |
| n2-ns-c2-nv   |   | 1.1    | 180.0  | 2.0 | Using | Y1                                                      | 1.8993 | 0.0941       |                  |
| default value |   |        |        |     |       | Y2                                                      | 2.2700 | 0.0095       |                  |
| c2-hn-nv-hn   |   | 1.1    | 180.0  | 2.0 | Using | Y3                                                      | 1.8993 | 0.0941       |                  |
| default value |   |        |        |     |       | Parameters complex 3                                    |        |              |                  |
| c2-n2-c2-na   |   | 1.1    | 180.0  | 2.0 | Using | <u>File off:</u>                                        |        |              |                  |
| default value |   |        |        |     |       | !!index array str                                       |        |              |                  |
| Y1-c2-c2-c2   |   | 1.1    | 180.0  | 2.0 | Using | "MOL"                                                   |        |              |                  |
| default value |   |        |        |     |       | !entry.MOL.unit.atoms table str name str type int typex |        |              |                  |
| Y1-h5-c2-na   |   | 1.1    | 180.0  | 2.0 | Using | int resx int flags int seq int elmnt dbl chg            |        |              |                  |
| default value |   |        |        |     |       | "P1" "p5" 0 1 131072 1 15 1.342234                      |        |              |                  |
| NONBON        |   |        |        |     |       | "O1" "o" 0 1 131072 2 8 -0.739517                       |        |              |                  |
| p5            |   | 2.0732 | 0.2295 |     |       | "O2" "oh" 0 1 131072 3 8 -0.845220                      |        |              |                  |
| Y4            |   | 1.7107 | 0.1463 |     |       | "O3" "o" 0 1 131072 4 8 -0.845220                       |        |              |                  |
| oh            |   | 1.8200 | 0.0930 |     |       | "O4" "os" 0 1 131072 5 8 -0.592939                      |        |              |                  |
| os            |   | 1.7713 | 0.0726 |     |       | "P2" "p5" 0 1 131072 6 15 1.252046                      |        |              |                  |
| c3            |   | 1.9069 | 0.1078 |     |       |                                                         |        |              |                  |

|                                      |                                                 |
|--------------------------------------|-------------------------------------------------|
| "O5" "o" 0 1 131072 7 8 -0.795894    | "H2" "h1" 0 1 131072 35 1 0.067284              |
| "O6" "o" 0 1 131072 8 8 -0.795894    | "H3" "h1" 0 1 131072 36 1 -0.012167             |
| "O7" "os" 0 1 131072 9 8 -0.476918   | "H4" "h1" 0 1 131072 37 1 0.098376              |
| "P3" "p5" 0 1 131072 10 15 1.117531  | "H5" "hc" 0 1 131072 38 1 0.118713              |
| "O8" "oh" 0 1 131072 11 8 -0.750455  | "H6" "hc" 0 1 131072 39 1 0.118713              |
| "O9" "o" 0 1 131072 12 8 -0.750455   | "H7" "h2" 0 1 131072 40 1 0.076893              |
| "O10" "os" 0 1 131072 13 8 -0.367908 | "H8" "h5" 0 1 131072 41 1 0.178019              |
| "C1" "c3" 0 1 131072 14 6 -0.063722  | "H9" "hn" 0 1 131072 42 1 0.418070              |
| "C2" "c3" 0 1 131072 15 6 0.200863   | "H10" "hn" 0 1 131072 43 1 0.292595             |
| "O11" "os" 0 1 131072 16 8 -0.513040 | "H11" "hn" 0 1 131072 44 1 0.373510             |
| "C3" "c3" 0 1 131072 17 6 0.741353   | "H12" "hn" 0 1 131072 45 1 0.373510             |
| "O12" "oh" 0 1 131072 18 8 -0.852226 | "H13" "hn" 0 1 131072 46 1 0.382053             |
| "C4" "c3" 0 1 131072 19 6 -0.443178  | "H14" "hn" 0 1 131072 47 1 0.371548             |
| "C5" "c3" 0 1 131072 20 6 0.265437   | "H15" "ho" 0 1 131072 48 1 0.457877             |
| "N1" "na" 0 1 131072 21 7 -0.105582  | "Pt1" "M1" 0 1 131072 49 15 0.343746            |
| "C6" "c2" 0 1 131072 22 6 0.043665   | "H16" "hn" 0 1 131072 50 1 0.371548             |
| "N2" "Y1" 0 1 131072 23 7 0.079178   | "H17" "hn" 0 1 131072 51 1 0.292595             |
| "C7" "c2" 0 1 131072 24 6 -0.534324  | "H18" "hn" 0 1 131072 52 1 0.292595             |
| "C8" "c2" 0 1 131072 25 6 0.980179   | "Cl1" "Y4" 0 1 131072 53 6 -0.730618            |
| "O13" "o" 0 1 131072 26 8 -0.680644  | !entry.MOL.unit.atomsptinfo table str pname str |
| "N3" "ns" 0 1 131072 27 7 -0.900675  | ptype int ptypex int pelmnt dbl pchg            |
| "C9" "c2" 0 1 131072 28 6 1.009076   | "P1" "p5" 0 -1 0.0                              |
| "N4" "nv" 0 1 131072 29 7 -0.963413  | "O1" "oh" 0 -1 0.0                              |
| "N5" "n2" 0 1 131072 30 7 -0.812736  | "O2" "o" 0 -1 0.0                               |
| "C10" "c2" 0 1 131072 31 6 0.586443  | "O3" "o" 0 -1 0.0                               |
| "N6" "Y2" 0 1 131072 32 7 -1.142330  | "O4" "os" 0 -1 0.0                              |
| "N7" "Y3" 0 1 131072 33 7 -0.597859  | "P2" "p5" 0 -1 0.0                              |
| "H1" "h1" 0 1 131072 34 1 0.067284   | "O5" "o" 0 -1 0.0                               |

|                     |                                          |
|---------------------|------------------------------------------|
| "O6" "o" 0 -1 0.0   | "H3" "h1" 0 -1 0.0                       |
| "O7" "os" 0 -1 0.0  | "H4" "h1" 0 -1 0.0                       |
| "P3" "p5" 0 -1 0.0  | "H5" "hc" 0 -1 0.0                       |
| "O8" "o" 0 -1 0.0   | "H6" "hc" 0 -1 0.0                       |
| "O9" "o" 0 -1 0.0   | "H7" "h2" 0 -1 0.0                       |
| "O10" "os" 0 -1 0.0 | "H8" "h5" 0 -1 0.0                       |
| "C1" "c3" 0 -1 0.0  | "H9" "hn" 0 -1 0.0                       |
| "C2" "c3" 0 -1 0.0  | "H10" "hn" 0 -1 0.0                      |
| "O11" "os" 0 -1 0.0 | "H11" "hn" 0 -1 0.0                      |
| "C3" "c3" 0 -1 0.0  | "H12" "hn" 0 -1 0.0                      |
| "O12" "oh" 0 -1 0.0 | "H13" "hn" 0 -1 0.0                      |
| "C4" "c3" 0 -1 0.0  | "H14" "hn" 0 -1 0.0                      |
| "C5" "c3" 0 -1 0.0  | "H15" "ho" 0 -1 0.0                      |
| "N1" "na" 0 -1 0.0  | "Pt1" "M1" 0 -1 0.0                      |
| "C6" "cc" 0 -1 0.0  | "H16" "hn" 0 -1 0.0                      |
| "N2" "Y1" 0 -1 0.0  | "H17" "hn" 0 -1 0.0                      |
| "C7" "cd" 0 -1 0.0  | "H18" "hn" 0 -1 0.0                      |
| "C8" "c" 0 -1 0.0   | "Cl1" "Y4" 0 -1 0.0                      |
| "O13" "o" 0 -1 0.0  | !entry.MOL.unit.boundbox array dbl       |
| "N3" "ns" 0 -1 0.0  | -1.000000                                |
| "C9" "cd" 0 -1 0.0  | 0.0                                      |
| "N4" "nv" 0 -1 0.0  | 0.0                                      |
| "N5" "nc" 0 -1 0.0  | 0.0                                      |
| "C10" "cc" 0 -1 0.0 | 0.0                                      |
| "N6" "Y2" 0 -1 0.0  | !entry.MOL.unit.childsequence single int |
| "N7" "Y3" 0 -1 0.0  | 2                                        |
| "H1" "h1" 0 -1 0.0  | !entry.MOL.unit.connect array int        |
| "H2" "h1" 0 -1 0.0  | 0                                        |

|                                                   |         |
|---------------------------------------------------|---------|
| 0                                                 | 19 38 1 |
| !entry.MOL.unit.connectivity table int atom1x int | 19 39 1 |
| atom2x int flags                                  | 20 21 1 |
| 1 2 1                                             | 20 40 1 |
| 1 3 1                                             | 21 22 1 |
| 1 4 1                                             | 21 31 1 |
| 1 5 1                                             | 22 23 2 |
| 5 6 1                                             | 22 41 1 |
| 6 7 1                                             | 23 24 1 |
| 6 8 1                                             | 23 49 1 |
| 6 9 1                                             | 24 25 1 |
| 9 10 1                                            | 24 31 2 |
| 10 11 1                                           | 25 26 2 |
| 10 12 1                                           | 25 27 1 |
| 10 13 1                                           | 27 28 1 |
| 13 14 1                                           | 27 42 1 |
| 14 15 1                                           | 28 29 1 |
| 14 34 1                                           | 28 30 2 |
| 14 35 1                                           | 29 44 1 |
| 15 16 1                                           | 29 45 1 |
| 15 17 1                                           | 30 31 1 |
| 15 36 1                                           | 32 47 1 |
| 16 20 1                                           | 32 50 1 |
| 17 18 1                                           | 32 49 1 |
| 17 19 1                                           | 32 46 1 |
| 17 37 1                                           | 33 43 1 |
| 18 48 1                                           | 33 51 1 |
| 19 20 1                                           | 33 52 1 |



|                                                   |              |
|---------------------------------------------------|--------------|
| 33 49 1                                           | "R" 1 "A" 24 |
| 49 53 1                                           | "R" 1 "A" 25 |
| !entry.MOL.unit.hierarchy table str abovetype int | "R" 1 "A" 26 |
| abovex str belowtype int belowx                   | "R" 1 "A" 27 |
| "U" 0 "R" 1                                       | "R" 1 "A" 28 |
| "R" 1 "A" 1                                       | "R" 1 "A" 29 |
| "R" 1 "A" 2                                       | "R" 1 "A" 30 |
| "R" 1 "A" 3                                       | "R" 1 "A" 31 |
| "R" 1 "A" 4                                       | "R" 1 "A" 32 |
| "R" 1 "A" 5                                       | "R" 1 "A" 33 |
| "R" 1 "A" 6                                       | "R" 1 "A" 34 |
| "R" 1 "A" 7                                       | "R" 1 "A" 35 |
| "R" 1 "A" 8                                       | "R" 1 "A" 36 |
| "R" 1 "A" 9                                       | "R" 1 "A" 37 |
| "R" 1 "A" 10                                      | "R" 1 "A" 38 |
| "R" 1 "A" 11                                      | "R" 1 "A" 39 |
| "R" 1 "A" 12                                      | "R" 1 "A" 40 |
| "R" 1 "A" 13                                      | "R" 1 "A" 41 |
| "R" 1 "A" 14                                      | "R" 1 "A" 42 |
| "R" 1 "A" 15                                      | "R" 1 "A" 43 |
| "R" 1 "A" 16                                      | "R" 1 "A" 44 |
| "R" 1 "A" 17                                      | "R" 1 "A" 45 |
| "R" 1 "A" 18                                      | "R" 1 "A" 46 |
| "R" 1 "A" 19                                      | "R" 1 "A" 47 |
| "R" 1 "A" 20                                      | "R" 1 "A" 48 |
| "R" 1 "A" 21                                      | "R" 1 "A" 49 |
| "R" 1 "A" 22                                      | "R" 1 "A" 50 |
| "R" 1 "A" 23                                      | "R" 1 "A" 51 |

|                                                   |                              |
|---------------------------------------------------|------------------------------|
| "R" 1 "A" 52                                      | 25.425000 6.666000 9.796000  |
| "R" 1 "A" 53                                      | 25.152000 6.438000 11.186000 |
| !entry.MOL.unit.name single str                   | 24.509000 7.058000 12.020000 |
| "MOL"                                             | 25.807000 5.220000 11.605000 |
| !entry.MOL.unit.positions table dbl x dbl y dbl z | 26.563000 4.392000 10.821000 |
| 22.341000 5.247000 4.971000                       | 27.122000 3.270000 11.463000 |
| 23.055000 6.361000 5.995000                       | 26.801000 4.606000 9.561000  |
| 20.962000 4.891000 5.451000                       | 26.220000 5.750000 9.090000  |
| 23.372000 4.180000 4.703000                       | 22.536000 8.954000 7.964000  |
| 22.110000 6.242000 3.628000                       | 23.652000 11.417000 8.078000 |
| 22.966000 7.350000 2.775000                       | 27.538000 9.044000 4.422000  |
| 24.314000 6.805000 2.342000                       | 26.466000 8.300000 3.210000  |
| 22.045000 7.973000 1.774000                       | 28.038000 6.673000 4.000000  |
| 23.228000 8.438000 4.066000                       | 25.140000 6.247000 4.695000  |
| 24.349000 9.623000 4.301000                       | 27.167000 4.096000 5.274000  |
| 23.789000 10.483000 5.421000                      | 25.548000 4.349000 5.988000  |
| 24.879000 10.221000 3.035000                      | 27.968000 5.193000 7.205000  |
| 25.592000 8.739000 5.040000                       | 25.458000 7.935000 6.839000  |
| 26.717000 8.324000 4.276000                       | 25.713000 5.039000 12.595000 |
| 27.189000 6.925000 4.656000                       | 23.761000 11.244000 7.051000 |
| 27.671000 6.856000 6.033000                       | 27.537000 2.681000 10.748000 |
| 26.126000 5.824000 4.504000                       | 26.425000 2.740000 11.978000 |
| 26.177000 5.239000 3.232000                       | 22.948000 7.252000 5.610000  |
| 26.455000 4.847000 5.641000                       | 22.682000 9.201000 6.977000  |
| 27.158000 5.721000 6.687000                       | 25.399000 5.661000 2.770000  |
| 26.285000 6.202000 7.801000                       | 24.243000 9.590000 8.857000  |
| 25.552000 7.349000 7.748000                       | 22.517000 7.933000 7.951000  |
| 25.039000 7.669000 8.929000                       | 24.249000 12.173000 8.403000 |

[illegible]

|             |           |              |              |
|-------------|-----------|--------------|--------------|
| 0.0 0.0 0.0 | h2 1.008  | 0.135        |              |
| 0.0 0.0 0.0 | h5 1.008  | 0.135        |              |
| 0.0 0.0 0.0 | hn 1.008  | 0.161        |              |
| 0.0 0.0 0.0 | ho 1.008  | 0.135        |              |
| 0.0 0.0 0.0 | M1 195.08 |              | Pt iY4n      |
| 0.0 0.0 0.0 | Y1 14.010 | 0.530        |              |
| 0.0 0.0 0.0 | Y2 14.010 | 0.530        |              |
| 0.0 0.0 0.0 | Y3 14.010 | 0.530        |              |
| 0.0 0.0 0.0 | Y4 35.45  | 1.910        |              |
| 0.0 0.0 0.0 |           |              |              |
| 0.0 0.0 0.0 | BOND      |              |              |
| 0.0 0.0 0.0 | p5-Y4     | 529.55 1.487 |              |
| 0.0 0.0 0.0 | p5-oh     | 346.03 1.615 |              |
|             | p5-os     | 346.25 1.615 |              |
|             | oh-ho     | 563.51 0.973 |              |
|             | os-c3     | 284.76 1.432 |              |
|             | c3-c3     | 232.52 1.538 |              |
|             | c3-h1     | 375.92 1.097 |              |
|             | c3-oh     | 293.40 1.423 |              |
|             | c3-hc     | 375.92 1.097 |              |
|             | c3-na     | 262.85 1.463 |              |
|             | c3-h2     | 377.33 1.096 |              |
|             | na-c2     | 327.66 1.401 |              |
|             | c2-n2     | 518.67 1.282 |              |
|             | c2-h5     | 386.13 1.091 |              |
|             | c2-c2     | 481.83 1.334 |              |
|             | c2-Y4     | 635.23 1.225 |              |
|             | c2-ns     | 330.19 1.399 | same as c2-n |

**File frcmod:**

remark gY4es here

MASS

|           |       |
|-----------|-------|
| p5 30.970 | 1.538 |
| oh 16.000 | 0.465 |
| os 16.000 | 0.465 |
| c3 12.010 | 0.878 |
| na 14.010 | 0.530 |
| c2 12.010 | 0.360 |
| n2 14.010 | 0.530 |
| ns 14.010 | 0.530 |
| nv 14.010 | 0.530 |
| n9 14.010 | 0.530 |
| h1 1.008  | 0.135 |
| hc 1.008  | 0.135 |

|           |         |         |                                            |          |         |                         |
|-----------|---------|---------|--------------------------------------------|----------|---------|-------------------------|
| ns-hn     | 527.31  | 1.013   | same as hn-n                               | oh-p5-os | 83.902  | 101.940                 |
| c2-nv     | 345.39  | 1.387   | same as c2-nh                              | os-p5-os | 83.949  | 101.840                 |
| nv-hn     | 529.46  | 1.012   | same as hn-nh                              | p5-os-c3 | 83.251  | 119.540                 |
| n9-hn     | 511.28  | 1.019   | same as hn-n3                              | os-c3-c3 | 85.306  | 107.970                 |
| n2-hn     | 501.09  | 1.023   |                                            | os-c3-h1 | 62.377  | 109.780                 |
| Y4 -ho    | 540.28  | 0.981   |                                            | c3-c3-c3 | 64.888  | 111.510                 |
| Y1-M1     | 80.3    | 2.1471  | Created by SeminariY4 method using MCPB.py | c3-c3-h1 | 46.868  | 109.560                 |
| Y2-M1     | 80.3    | 2.1471  | Created by SeminariY4 method using MCPB.py | c3-os-c3 | 66.293  | 112.480                 |
| Y3-M1     | 80.0    | 2.1471  | Created by SeminariY4 method using MCPB.py | c3-c3-oh | 84.642  | 110.190                 |
| Y4-M1     | 212.0   | 2.10    | Created by SeminariY4 method using MCPB.py | os-c3-na | 109.296 | 109.030                 |
| Y2-hn     | 511.28  | 1.019   | same as hn-n3                              | o -c2-ns | 109.296 | 109.030                 |
| Y3-hn     | 501.09  | 1.023   |                                            | os-c3-h2 | 62.442  | 109.580                 |
| Y3-ho     | 501.09  | 1.023   |                                            | c3-oh-ho | 49.027  | 107.260                 |
| Y4-ho     | 540.28  | 0.981   |                                            | c3-c3-hc | 46.816  | 109.800                 |
| c2-Y1     | 518.67  | 1.282   |                                            | oh-c3-h1 | 62.540  | 110.260                 |
| oh-M1     | 81.6    | 2.6178  |                                            | c3-c3-na | 82.668  | 112.880                 |
| ANGLE     |         |         |                                            | c3-c3-h2 | 46.730  | 110.220                 |
| p5-oh-ho  | 58.997  | 110.080 |                                            | c3-na-c2 | 65.723  | 117.200                 |
| p5-oh-M1  | 58.997  | 110.080 |                                            | na-c3-h2 | 61.963  | 107.310                 |
| p5-Y4 -M1 | 58.997  | 110.080 |                                            | na-c2-n2 | 110.312 | 123.620                 |
| p5-os-p5  | 106.787 | 126.250 |                                            | na-c2-h5 | 59.208  | 126.390                 |
| Y4 -p5-oh | 81.901  | 115.210 |                                            | na-c2-c2 | 87.232  | 121.940                 |
| Y4 -p5-o  | 85.510  | 115.800 |                                            | c2-na-c2 | 69.273  | 110.370                 |
| Y4 -p5-os | 81.819  | 115.460 |                                            | c2-n2-c2 | 73.202  | 118.180                 |
|           |         |         |                                            | n2-c2-h5 | 64.543  | 121.700                 |
|           |         |         |                                            | n2-c2-c2 | 89.778  | 126.010                 |
|           |         |         |                                            | c2-c2-Y4 | 89.793  | 130.890                 |
|           |         |         |                                            | c2-c2-ns | 86.693  | 123.670 same as c2-c2-n |

|           |         |         |                                    |              |         |         |                      |
|-----------|---------|---------|------------------------------------|--------------|---------|---------|----------------------|
| c2-c2-c2  | 71.539  | 121.810 |                                    | Y3-M1-Y4     | 182.71  | 96.43   | Created by Seminario |
| c2-ns-c2  | 67.455  | 116.750 | same as c2-n -c2                   |              |         |         | method using MCPB.py |
| c2-ns-hn  | 47.988  | 117.900 | same as c2-n -hn                   | oh-M1-Y2     | 180.43  | 83.80   | Created by Seminario |
| Y4 -c2-ns | 75.107  | 117.460 | Calculated with empirical approach |              |         |         | method using MCPB.py |
| ns-c2-nv  | 113.384 | 109.350 | same as n -c2-nh                   | oh-M1-Y3     | 182.43  | 83.80   | Created by Seminario |
| ns-c2-n2  | 110.772 | 122.820 | same as n -c2-n2                   |              |         |         | method using MCPB.py |
| c2-nv-hn  | 48.954  | 115.090 | same as c2-nh-hn                   | oh-M1-Y1     | 182.43  | 93.80   | Created by Seminario |
| nv-c2-n2  | 110.708 | 124.270 | same as n2-c2-nh                   |              |         |         | method using MCPB.py |
| h1-c3-h1  | 38.802  | 108.460 |                                    | oh-M1-Y4     | 182.71  | 86.43   | Created by Seminario |
| hc-c3-hc  | 38.960  | 107.580 |                                    |              |         |         | method using MCPB.py |
| hn-nv-hn  | 39.519  | 115.120 | same as hn-nh-hn                   | ho -oh-M1    | 72.71   | 86.43   | Created by Seminario |
| hn-n9-hn  | 40.828  | 106.400 | same as hn-n3-hn                   |              |         |         | method using MCPB.py |
| hn-n2-hn  | 38.294  | 120.000 |                                    | Y4 -M1-oh    | 72.71   | 76.43   | Created by Seminario |
| M1-Y2-hn  | 67.55   | 104.19  | Created by Seminario               |              |         |         | method using MCPB.py |
|           |         |         | method using MCPB.py               | c2-Y1-M1     | 11.11   | 120.68  | Created by Seminario |
| M1-Y3-hn  | 67.39   | 104.19  | Created by Seminario               |              |         |         | method using MCPB.py |
|           |         |         | method using MCPB.py               | Y1-c2-c2     | 89.778  | 126.010 |                      |
| M1-Y3-ho  | 67.39   | 104.19  |                                    | c2-Y1-c2     | 73.202  | 118.180 |                      |
| M1-Y4-ho  | 50.01   | 91.15   | Created by Seminario               | h5-c2-Y1     | 52.26   | 121.70  | SOURCE4_SOURCE5      |
|           |         |         | method using MCPB.py               | 71           | 2.1538  |         |                      |
| Y1-M1-Y2  | 182.00  | 90.94   | Created by Seminario               | hn-Y2-hn     | 40.828  | 106.400 | same as hn-n3-hn     |
|           |         |         | method using MCPB.py               | hn-Y3-hn     | 38.294  | 120.000 |                      |
| Y1-M1-Y3  | 182.48  | 180.46  | Created by Seminario               | ho-Y3-hn     | 38.294  | 120.000 |                      |
|           |         |         | method using MCPB.py               | na-c2-Y1     | 110.312 | 123.620 |                      |
| Y1-M1-Y4  | 182.50  | 89.61   | Created by Seminario               | ho-Y4-ho     | 38.294  | 120.000 |                      |
|           |         |         | method using MCPB.py               |              |         |         |                      |
| Y2-M1-Y3  | 182.00  | 87.62   | Created by Seminario               | DIHE         |         |         |                      |
|           |         |         | method using MCPB.py               | p5-os-p5-o   | 1       | 0.800   | 0.000 2.000          |
| Y2-M1-Y4  | 182.43  | 183.80  | Created by Seminario               | p5-os-p5-os  | 1       | 0.800   | 0.000 2.000          |
|           |         |         | method using MCPB.py               | Y4 -p5-oh-ho | 1       | 0.367   | 0.000 3.000          |
|           |         |         |                                    | oh-p5-os-p5  | 1       | 0.800   | 0.000 2.000          |

|              |   |       |         |        |             |   |       |         |        |
|--------------|---|-------|---------|--------|-------------|---|-------|---------|--------|
| os-p5-oh-ho  | 1 | 0.533 | 0.000   | 3.000  | os-c3-c3-oh | 1 | 1.010 | 0.000   | -3.000 |
| os-p5-os-c3  | 1 | 0.000 | 0.000   | -3.000 | os-c3-c3-oh | 1 | 0.000 | 0.000   | -2.000 |
| os-p5-os-c3  | 1 | 2.610 | 0.000   | 2.000  | os-c3-c3-oh | 1 | 0.020 | 180.000 | 1.000  |
| p5-os-c3-c3  | 1 | 0.383 | 0.000   | -3.000 | os-c3-c3-hc | 1 | 0.000 | 0.000   | -3.000 |
| p5-os-c3-c3  | 1 | 3.950 | 180.000 | 1.000  | os-c3-c3-hc | 1 | 0.250 | 0.000   | 1.000  |
| p5-os-c3-h1  | 1 | 0.217 | 0.000   | 3.000  | os-c3-na-c2 | 1 | 0.000 | 0.000   | -2.000 |
| oh-p5-os-c3  | 1 | 0.250 | 0.000   | -3.000 | os-c3-na-c2 | 1 | 2.500 | 0.000   | 1.000  |
| oh-p5-os-c3  | 1 | 1.200 | 0.000   | 2.000  | c3-c3-c3-na | 1 | 0.156 | 0.000   | 3.000  |
| Y4 -p5-os-c3 | 1 | 0.800 | 0.000   | -2.000 | c3-c3-c3-h2 | 1 | 0.156 | 0.000   | 3.000  |
| Y4 -p5-os-c3 | 1 | 0.550 | 0.000   | 3.000  | oh-c3-c3-h1 | 1 | 0.000 | 0.000   | -3.000 |
| os-c3-c3-os  | 1 | 0.000 | 0.000   | -3.000 | oh-c3-c3-h1 | 1 | 0.250 | 0.000   | 1.000  |
| os-c3-c3-os  | 1 | 0.000 | 180.000 | -2.000 | oh-c3-c3-hc | 1 | 0.180 | 0.000   | -3.000 |
| os-c3-c3-os  | 1 | 0.170 | 180.000 | 1.000  | oh-c3-c3-h  | 1 | 0.510 | 0.000   | 1.000  |
| os-c3-c3-c3  | 1 | 0.156 | 0.000   | 3.000  | c3-c3-na-c2 | 1 | 0.000 | 0.000   | 2.000  |
| os-c3-c3-h1  | 1 | 0.000 | 0.000   | -3.000 | c3-os-c3-h1 | 1 | 0.337 | 0.000   | 3.000  |
| os-c3-c3-h1  | 1 | 0.250 | 0.000   | 1.000  | c3-na-c2-n2 | 1 | 0.625 | 180.000 | 2.000  |
| c3-c3-os-c3  | 1 | 0.240 | 0.000   | -3.000 | c3-na-c2-h5 | 1 | 0.625 | 180.000 | 2.000  |
| c3-c3-os-c3  | 1 | 0.160 | 0.000   | 2.000  | c3-na-c2-c2 | 1 | 0.625 | 180.000 | 2.000  |
| c3-c3-c3-oh  | 1 | 0.210 | 0.000   | 3.000  | na-c3-c3-hc | 1 | 0.156 | 0.000   | 3.000  |
| c3-c3-c3-c3  | 1 | 0.130 | 0.000   | -3.000 | na-c2-n2-c2 | 1 | 4.150 | 180.000 | 2.000  |
| c3-c3-c3-c3  | 1 | 0.290 | 180.000 | -2.000 | na-c2-c2-n2 | 1 | 6.650 | 180.000 | 2.000  |
| c3-c3-c3-c3  | 1 | 0.110 | 0.000   | 1.000  | na-c2-c2-c2 | 1 | 6.650 | 180.000 | 2.000  |
| c3-c3-c3-h1  | 1 | 0.156 | 0.000   | 3.000  | c2-na-c3-h2 | 1 | 0.000 | 0.000   | 2.000  |
| c3-os-c3-na  | 1 | 0.383 | 0.000   | -3.000 | c2-na-c2-c2 | 1 | 0.625 | 180.000 | 2.000  |
| c3-os-c3-na  | 1 | 0.650 | 0.000   | 2.000  | c2-na-c2-n2 | 1 | 0.625 | 180.000 | 2.000  |
| c3-os-c3-h2  | 1 | 0.383 | 0.000   | 3.000  | c2-n2-c2-c2 | 1 | 4.150 | 180.000 | 2.000  |
| c3-c3-oh-ho  | 1 | 0.000 | 0.000   | 3.000  | n2-c2-c2-Y4 | 1 | 6.650 | 180.000 | 2.000  |
| c3-c3-c3-hc  | 1 | 0.080 | 0.000   | 3.000  | n2-c2-c2-ns | 1 | 6.650 | 180.000 | 2.000  |



|               |   |       |         |       |      |                  |   |       |       |       |          |
|---------------|---|-------|---------|-------|------|------------------|---|-------|-------|-------|----------|
| n2-c2-c2-n2   | 1 | 6.650 | 180.000 | 2.000 |      | hc-c3-c3-h2      | 1 | 0.156 | 0.000 | 3.000 |          |
| c2-n2-c2-h5   | 1 | 4.150 | 180.000 | 2.000 |      | M1-Y1-c2-c2      | 3 | 0.00  | 0.00  | 3.0   | Treat as |
| c2-c2-ns-c2   | 1 | 0.650 | 180.000 | 2.000 | same | zerY4 by MCPB.py |   |       |       |       |          |
| as X -c2-n -X |   |       |         |       |      | Y1-M1-Y2-hn      | 3 | 0.00  | 0.00  | 3.0   | Treat as |
| c2-c2-ns-hn   | 1 | 0.650 | 180.000 | 2.000 | same | zerY4 by MCPB.py |   |       |       |       |          |
| as X -c2-n -X |   |       |         |       |      | oh-M1-Y2-hn      | 3 | 0.00  | 0.00  | 3.0   | Treat as |
| c2-c2-c2-n2   | 1 | 6.650 | 180.000 | 2.000 |      | zero by MCPB.py  |   |       |       |       |          |
| c2-ns-c2-nv   | 1 | 0.650 | 180.000 | 2.000 | same | oh-M1-Y3-hn      | 3 | 0.00  | 0.00  | 3.0   | Treat as |
| as X -c2-n -X |   |       |         |       |      | zero by MCPB.py  |   |       |       |       |          |
| c2-ns-c2-n2   | 1 | 0.650 | 180.000 | 2.000 | same | oh-M1-Y1-c2      | 3 | 0.00  | 0.00  | 3.0   | Treat as |
| as X -c2-n -X |   |       |         |       |      | zero by MCPB.py  |   |       |       |       |          |
| Y4 -c2-c2-c2  | 1 | 6.650 | 180.000 | 2.000 |      | oh-M1-Y4-ho      | 3 | 0.00  | 0.00  | 3.0   | Treat as |
| Y4 -c2-ns-c2  | 1 | 0.650 | 180.000 | 2.000 | same | zero by MCPB.py  |   |       |       |       |          |
| as X -c2-n -X |   |       |         |       |      | Y1-M1-Y3-hn      | 3 | 0.00  | 0.00  | 3.0   | Treat as |
| Y4 -c2-ns-hn  | 1 | 0.650 | 180.000 | 2.000 | same | zerY4 by MCPB.py |   |       |       |       |          |
| as X -c2-n -X |   |       |         |       |      | Y1-M1-Y4-ho      | 3 | 0.00  | 0.00  | 3.0   | Treat as |
| ns-c2-c2-c2   | 1 | 6.650 | 180.000 | 2.000 |      | zero by MCPB.py  |   |       |       |       |          |
| ns-c2-nv-hn   | 1 | 0.675 | 180.000 | 2.000 | same | Y1-c2-c2-n2      | 1 | 6.65  | 180.0 | 2.0   |          |
| as X -c2-nh-X |   |       |         |       |      | Y1-c2-c2-ns      | 1 | 6.65  | 180.0 | 2.0   |          |
| ns-c2-n2-c2   | 1 | 4.150 | 180.000 | 2.000 |      | Y1-c2-c2-Y4      | 1 | 6.65  | 180.0 | 2.0   |          |
| nv-c2-ns-hn   | 1 | 0.650 | 180.000 | 2.000 | same | Y2-M1-Y1-c2      | 3 | 0.00  | 0.00  | 3.0   | Treat as |
| as X -c2-n -X |   |       |         |       |      | zerY4 by MCPB.py |   |       |       |       |          |
| nv-c2-n2-c2   | 1 | 4.150 | 180.000 | 2.000 |      | Y2-M1-Y3-hn      | 3 | 0.00  | 0.00  | 3.0   | Treat as |
| n2-c2-ns-hn   | 1 | 0.650 | 180.000 | 2.000 | same | zerY4 by MCPB.py |   |       |       |       |          |
| as X -c2-n -X |   |       |         |       |      | Y2-M1-Y4-ho      | 3 | 0.00  | 0.00  | 3.0   | Treat as |
| n2-c2-nv-hn   | 1 | 0.675 | 180.000 | 2.000 | same | zero by MCPB.py  |   |       |       |       |          |
| as X -c2-nh-X |   |       |         |       |      | Y3-M1-Y1-c2      | 3 | 0.00  | 0.00  | 3.0   | Treat as |
| c2-na-c2-h5   | 1 | 0.625 | 180.000 | 2.000 |      | zerY4 by MCPB.py |   |       |       |       |          |
| h1-c3-c3-h1   | 1 | 0.156 | 0.000   | 3.000 |      | Y3-M1-Y2-hn      | 3 | 0.00  | 0.00  | 3.0   | Treat as |
| h1-c3-oh-ho   | 1 | 0.113 | 0.000   | 3.000 |      | zerY4 by MCPB.py |   |       |       |       |          |
| h1-c3-c3-hc   | 1 | 0.156 | 0.000   | 3.000 |      | Y3-M1-Y4-ho      | 3 | 0.00  | 0.00  | 3.0   | Treat as |
|               |   |       |         |       |      | zero by MCPB.py  |   |       |       |       |          |

|                  |   |       |       |     |          |               |        |        |     |       |
|------------------|---|-------|-------|-----|----------|---------------|--------|--------|-----|-------|
| Y4-M1-Y1-c2      | 3 | 0.00  | 0.00  | 3.0 | Treat as | h5-n2-c2-na   | 1.1    | 180.0  | 2.0 | Using |
| zerY4 by MCPB.py |   |       |       |     |          | default value |        |        |     |       |
| Y4-M1-Y2-hn      | 3 | 0.00  | 0.00  | 3.0 | Treat as | c2-c2-c2-n2   | 1.1    | 180.0  | 2.0 | Using |
| zerY4 by MCPB.py |   |       |       |     |          | default value |        |        |     |       |
| Y4-M1-Y3-hn      | 3 | 0.00  | 0.00  | 3.0 | Treat as | c2-ns-c2-Y4   | 1.1    | 180.0  | 2.0 | Using |
| zerY4 by MCPB.py |   |       |       |     |          | default value |        |        |     |       |
| c2-Y1-M1-Y2      | 3 | 0.00  | 0.00  | 3.0 | Treat as | c2-c2-ns-hn   | 1.1    | 180.0  | 2.0 | Using |
| zerY4 by MCPB.py |   |       |       |     |          | default value |        |        |     |       |
| c2-Y1-M1-Y3      | 3 | 0.00  | 0.00  | 3.0 | Treat as | n2-ns-c2-nv   | 1.1    | 180.0  | 2.0 | Using |
| zerY4 by MCPB.py |   |       |       |     |          | default value |        |        |     |       |
| c2-Y1-M1-Y4      | 3 | 0.00  | 0.00  | 3.0 | Treat as | c2-hn-nv-hn   | 1.1    | 180.0  | 2.0 | Using |
| zerY4 by MCPB.py |   |       |       |     |          | default value |        |        |     |       |
| c2-Y1-c2-c2      | 1 | 4.15  | 180.0 | 2.0 |          | c2-n2-c2-na   | 1.1    | 180.0  | 2.0 | Using |
|                  |   |       |       |     |          | default value |        |        |     |       |
| c2-na-c2-Y1      | 1 | 0.625 | 180.0 | 2.0 |          | Y1-c2-c2-c2   | 1.1    | 180.0  | 2.0 | Using |
|                  |   |       |       |     |          | default value |        |        |     |       |
| c3-na-c2-Y1      | 1 | 0.625 | 180.0 | 2.0 |          | Y1-h5-c2-na   | 1.1    | 180.0  | 2.0 | Using |
|                  |   |       |       |     |          | default value |        |        |     |       |
| h5-c2-Y1-M1      | 3 | 0.00  | 0.00  | 3.0 | Treat as |               |        |        |     |       |
| zerY4 by MCPB.py |   |       |       |     |          |               |        |        |     |       |
| h5-c2-Y1-c2      | 1 | 4.15  | 180.0 | 2.0 |          |               |        |        |     |       |
|                  |   |       |       |     |          |               |        |        |     |       |
| na-c2-Y1-M1      | 3 | 0.00  | 0.00  | 3.0 | Treat as | NONBON        |        |        |     |       |
| zerY4 by MCPB.py |   |       |       |     |          |               |        |        |     |       |
| na-c2-Y1-c2      | 1 | 4.15  | 180.0 | 2.0 |          | p5            | 2.0732 | 0.2295 |     |       |
|                  |   |       |       |     |          | Y4            | 1.9452 | 0.2638 |     |       |
| na-c2-c2-Y1      | 1 | 6.65  | 180.0 | 2.0 |          | oh            | 1.8200 | 0.0930 |     |       |
|                  |   |       |       |     |          | os            | 1.7713 | 0.0726 |     |       |
| ho-Y3-M1-Y4      | 3 | 0.00  | 0.00  | 3.0 |          | c3            | 1.9069 | 0.1078 |     |       |
|                  |   |       |       |     |          | na            | 1.7992 | 0.2042 |     |       |
| Y2-M1-Y3-ho      | 3 | 0.00  | 0.00  | 3.0 |          | c2            | 1.8606 | 0.0988 |     |       |
|                  |   |       |       |     |          | n2            | 1.8993 | 0.0941 |     |       |
| Y1-M1-Y3-ho      | 3 | 0.00  | 0.00  | 3.0 |          | ns            | 1.8352 | 0.1174 |     |       |
|                  |   |       |       |     |          | nv            | 1.8903 | 0.1120 |     |       |
| o -c2-ns-c2      | 3 | 0.00  | 0.00  | 3.0 |          | n9            | 2.2700 | 0.0095 |     |       |
|                  |   |       |       |     |          |               |        |        |     |       |
| o -c2-ns-hn      | 3 | 0.00  | 0.00  | 3.0 |          |               |        |        |     |       |
|                  |   |       |       |     |          |               |        |        |     |       |
| IMPROPER         |   |       |       |     |          |               |        |        |     |       |
| c2-c2-na-c3      |   | 1.1   | 180.0 | 2.0 |          |               |        |        |     |       |

|    |        |        |
|----|--------|--------|
| h1 | 1.3593 | 0.0208 |
| hc | 1.4593 | 0.0208 |
| h2 | 1.2593 | 0.0208 |
| h5 | 1.3735 | 0.0161 |
| hn | 0.6210 | 0.0100 |
| ho | 0.3019 | 0.0047 |

|    |        |              |                                                                           |
|----|--------|--------------|---------------------------------------------------------------------------|
| M1 | 1.2660 | 0.0030764200 | CM set fY4r Pt2+<br>ion in TIP3P water from Li et al. JCTC, 2013, 9, 2733 |
| Y1 | 1.8993 | 0.0941       |                                                                           |
| Y2 | 2.2700 | 0.0095       |                                                                           |
| Y3 | 1.8993 | 0.0941       |                                                                           |
